# Supplementary material for: Divalent metals can reside on bonds in fullerenes
Source: Royal Society of Chemistry journal article supplement (doi:10.1039/c4dt03766a), 2015-01-01
Supplement: c4dt03766a2.pdf [file c4dt03766a2.pdf]

1a

B3LYP/CEP121G Etot = -2398.15504599 Hartree/Minimum\_Frequency\_Value = 37.39 cm-1/Spin\_Multiplicity = 7/Point

Group = CS

|   |             |             |             |
|---|-------------|-------------|-------------|
| C | 2.78887800  | -1.88340000 | 0.73696300  |
| C | 2.78887800  | -1.88340000 | -0.73696300 |
| C | 1.73839000  | -2.55227700 | -1.42550400 |
| C | 0.69818400  | -3.31424800 | -0.73916400 |
| C | 0.69818400  | -3.31424800 | 0.73916400  |
| C | 1.73839000  | -2.55227700 | 1.42550400  |
| C | 3.26343000  | -0.61156700 | 1.18533200  |
| C | 3.54816000  | 0.19145500  | 0.00000000  |
| C | 3.26343000  | -0.61156700 | -1.18533200 |
| C | 2.71039700  | 0.00949600  | -2.33813200 |
| C | 1.15321200  | -1.89733900 | -2.58852900 |
| C | -0.55320700 | -3.06333200 | -1.45892000 |
| C | -1.78608400 | -2.83071000 | -0.73869200 |
| C | -1.78608400 | -2.83071000 | 0.73869200  |
| C | -0.55320700 | -3.06333200 | 1.45892000  |
| C | -0.26278500 | -2.19293200 | 2.59703300  |
| C | 1.15321200  | -1.89733900 | 2.58852900  |
| C | 1.63586900  | -0.64788800 | 3.03956400  |
| C | 2.71039700  | 0.00949600  | 2.33813200  |
| C | 3.27118500  | 1.55692200  | 0.00000000  |
| C | 2.69982500  | 2.19253800  | 1.18192300  |
| C | 2.42308400  | 1.42309600  | 2.32368900  |
| C | 1.17618000  | 1.64180900  | 3.04935500  |
| C | 0.69252900  | 0.35451700  | 3.50353500  |
| C | -0.68595900 | 0.07580900  | 3.50160400  |
| C | -1.18036800 | -1.20604200 | 3.05502000  |
| C | -2.42267000 | -0.99710100 | 2.34206700  |
| C | -2.67424000 | -1.78049200 | 1.17796600  |
| C | -0.26278500 | -2.19293200 | -2.59703300 |
| C | -3.26023600 | 1.02575800  | -1.18264800 |
| C | -2.70420400 | 0.41242000  | -2.32662000 |
| C | -1.62930800 | 1.08778500  | -3.04486300 |
| C | -1.15870600 | 2.32245200  | -2.60064500 |
| C | -1.73931500 | 2.95475600  | -1.42423800 |
| C | -2.77043000 | 2.30562400  | 0.73111200  |
| C | -3.26023600 | 1.02575800  | 1.18264800  |
| C | -3.53114000 | 0.22881500  | 0.00000000  |
| C | -3.23727700 | -1.14340000 | 0.00000000  |
| C | -2.67424000 | -1.78049200 | -1.17796600 |
| C | -2.42267000 | -0.99710100 | -2.34206700 |
| C | -0.68595900 | 0.07580900  | -3.50160400 |

|    |             |             |             |
|----|-------------|-------------|-------------|
| C  | 0.69252900  | 0.35451700  | -3.50353500 |
| C  | 1.17618000  | 1.64180900  | -3.04935500 |
| C  | 0.27012900  | 2.60990600  | -2.60305800 |
| C  | 0.56296500  | 3.40494200  | -1.42733600 |
| C  | -0.67542400 | 3.62006900  | -0.70363500 |
| C  | -0.67542400 | 3.62006900  | 0.70363500  |
| C  | -1.73931500 | 2.95475600  | 1.42423800  |
| C  | -2.70420400 | 0.41242000  | 2.32662000  |
| C  | -1.62930800 | 1.08778500  | 3.04486300  |
| C  | -1.15870600 | 2.32245200  | 2.60064500  |
| C  | 0.27012900  | 2.60990600  | 2.60305800  |
| C  | 0.56296500  | 3.40494200  | 1.42733600  |
| C  | 1.76296400  | 3.19306300  | 0.72823300  |
| C  | 1.76296400  | 3.19306300  | -0.72823300 |
| C  | 2.69982500  | 2.19253800  | -1.18192300 |
| C  | 2.42308400  | 1.42309600  | -2.32368900 |
| C  | -1.18036800 | -1.20604200 | -3.05502000 |
| C  | 1.63586900  | -0.64788800 | -3.03956400 |
| C  | -2.77043000 | 2.30562400  | -0.73111200 |
| Gd | -0.01848100 | -1.13880200 | 0.00000000  |

### 1b

B3LYP/CEP121G Etot = -2398.13735529 Hartree/Minimum\_Frequency\_Value = 32.59 cm-1/Spin\_Multiplicity = 7/Point

Group = C2v

|   |             |             |             |
|---|-------------|-------------|-------------|
| C | -2.33050600 | 2.60850200  | -0.86651900 |
| C | -2.34163900 | 2.61073900  | 0.57398900  |
| C | -1.18692700 | 3.03061100  | 1.29119500  |
| C | 0.00000000  | 3.45614000  | 0.55924600  |
| C | 0.00000000  | 3.45658100  | -0.83787000 |
| C | -1.18429700 | 3.02977100  | -1.57129800 |
| C | -3.05122600 | 1.42976300  | -1.32621000 |
| C | -3.50577300 | 0.69799200  | -0.15359800 |
| C | -3.05095700 | 1.43321900  | 1.02084100  |
| C | -2.62164000 | 0.72229300  | 2.15668400  |
| C | -0.74101400 | 2.30856200  | 2.44884600  |
| C | 1.18692700  | 3.03061100  | 1.29119500  |
| C | 2.34163900  | 2.61073900  | 0.57398900  |
| C | 2.33050600  | 2.60850200  | -0.86651900 |
| C | 1.18429700  | 3.02977100  | -1.57129800 |
| C | 0.73210700  | 2.30227800  | -2.73182400 |
| C | -0.73210700 | 2.30227800  | -2.73182400 |
| C | -1.42497900 | 1.16812200  | -3.17659900 |
| C | -2.60960100 | 0.72619200  | -2.44808800 |
| C | -3.50577300 | -0.69799200 | -0.15359800 |

|    |             |             |             |
|----|-------------|-------------|-------------|
| C  | -3.05122600 | -1.42976300 | -1.32621000 |
| C  | -2.60960100 | -0.72619200 | -2.44808800 |
| C  | -1.42497900 | -1.16812200 | -3.17659900 |
| C  | -0.70742800 | 0.00000000  | -3.63424300 |
| C  | 0.70742800  | 0.00000000  | -3.63424300 |
| C  | 1.42497900  | 1.16812200  | -3.17659900 |
| C  | 2.60960100  | 0.72619200  | -2.44808800 |
| C  | 3.05122600  | 1.42976300  | -1.32621000 |
| C  | 0.74101400  | 2.30856200  | 2.44884600  |
| C  | 3.05095700  | -1.43321900 | 1.02084100  |
| C  | 2.62164000  | -0.72229300 | 2.15668400  |
| C  | 1.43537100  | -1.16423800 | 2.90355700  |
| C  | 0.74101400  | -2.30856200 | 2.44884600  |
| C  | 1.18692700  | -3.03061100 | 1.29119500  |
| C  | 2.33050600  | -2.60850200 | -0.86651900 |
| C  | 3.05122600  | -1.42976300 | -1.32621000 |
| C  | 3.50577300  | -0.69799200 | -0.15359800 |
| C  | 3.50577300  | 0.69799200  | -0.15359800 |
| C  | 3.05095700  | 1.43321900  | 1.02084100  |
| C  | 2.62164000  | 0.72229300  | 2.15668400  |
| C  | 0.72841700  | 0.00000000  | 3.39422700  |
| C  | -0.72841700 | 0.00000000  | 3.39422700  |
| C  | -1.43537100 | -1.16423800 | 2.90355700  |
| C  | -0.74101400 | -2.30856200 | 2.44884600  |
| C  | -1.18692700 | -3.03061100 | 1.29119500  |
| C  | 0.00000000  | -3.45614000 | 0.55924600  |
| C  | 0.00000000  | -3.45658100 | -0.83787000 |
| C  | 1.18429700  | -3.02977100 | -1.57129800 |
| C  | 2.60960100  | -0.72619200 | -2.44808800 |
| C  | 1.42497900  | -1.16812200 | -3.17659900 |
| C  | 0.73210700  | -2.30227800 | -2.73182400 |
| C  | -0.73210700 | -2.30227800 | -2.73182400 |
| C  | -1.18429700 | -3.02977100 | -1.57129800 |
| C  | -2.33050600 | -2.60850200 | -0.86651900 |
| C  | -2.34163900 | -2.61073900 | 0.57398900  |
| C  | -3.05095700 | -1.43321900 | 1.02084100  |
| C  | -2.62164000 | -0.72229300 | 2.15668400  |
| C  | 1.43537100  | 1.16423800  | 2.90355700  |
| C  | -1.43537100 | 1.16423800  | 2.90355700  |
| C  | 2.34163900  | -2.61073900 | 0.57398900  |
| Gd | 0.00000000  | 0.00000000  | 0.80187900  |

2

B3LYP/CEP121G Etot = -2382.15302345 Hartree/Minimum\_Frequency\_Value = 27.46 cm-1/Spin\_Multiplicity = 8/Point

Group = C2v

|   |             |             |             |
|---|-------------|-------------|-------------|
| C | -2.33049700 | 2.60818800  | -0.85912400 |
| C | -2.34166800 | 2.61035800  | 0.58141400  |
| C | -1.18663300 | 3.02911900  | 1.29857100  |
| C | 0.00000000  | 3.45519700  | 0.56661000  |
| C | 0.00000000  | 3.45598200  | -0.83066700 |
| C | -1.18437100 | 3.02963700  | -1.56410800 |
| C | -3.05154600 | 1.42966700  | -1.31876400 |
| C | -3.50657900 | 0.69806800  | -0.14621400 |
| C | -3.05128600 | 1.43281600  | 1.02841100  |
| C | -2.62187800 | 0.72231100  | 2.16435000  |
| C | -0.74095100 | 2.30897400  | 2.45781600  |
| C | 1.18663300  | 3.02911900  | 1.29857100  |
| C | 2.34166800  | 2.61035800  | 0.58141400  |
| C | 2.33049700  | 2.60818800  | -0.85912400 |
| C | 1.18437100  | 3.02963700  | -1.56410800 |
| C | 0.73209000  | 2.30216200  | -2.72472600 |
| C | -0.73209000 | 2.30216200  | -2.72472600 |
| C | -1.42510800 | 1.16802200  | -3.16938900 |
| C | -2.60986500 | 0.72613100  | -2.44086400 |
| C | -3.50657900 | -0.69806800 | -0.14621400 |
| C | -3.05154600 | -1.42966700 | -1.31876400 |
| C | -2.60986500 | -0.72613100 | -2.44086400 |
| C | -1.42510800 | -1.16802200 | -3.16938900 |
| C | -0.70746300 | 0.00000000  | -3.62710700 |
| C | 0.70746300  | 0.00000000  | -3.62710700 |
| C | 1.42510800  | 1.16802200  | -3.16938900 |
| C | 2.60986500  | 0.72613100  | -2.44086400 |
| C | 3.05154600  | 1.42966700  | -1.31876400 |
| C | 0.74095100  | 2.30897400  | 2.45781600  |
| C | 3.05128600  | -1.43281600 | 1.02841100  |
| C | 2.62187800  | -0.72231100 | 2.16435000  |
| C | 1.43494200  | -1.16391000 | 2.91120000  |
| C | 0.74095100  | -2.30897400 | 2.45781600  |
| C | 1.18663300  | -3.02911900 | 1.29857100  |
| C | 2.33049700  | -2.60818800 | -0.85912400 |
| C | 3.05154600  | -1.42966700 | -1.31876400 |
| C | 3.50657900  | -0.69806800 | -0.14621400 |
| C | 3.50657900  | 0.69806800  | -0.14621400 |
| C | 3.05128600  | 1.43281600  | 1.02841100  |
| C | 2.62187800  | 0.72231100  | 2.16435000  |
| C | 0.72813500  | 0.00000000  | 3.40073400  |

|    |             |             |             |
|----|-------------|-------------|-------------|
| C  | -0.72813500 | 0.00000000  | 3.40073400  |
| C  | -1.43494200 | -1.16391000 | 2.91120000  |
| C  | -0.74095100 | -2.30897400 | 2.45781600  |
| C  | -1.18663300 | -3.02911900 | 1.29857100  |
| C  | 0.00000000  | -3.45519700 | 0.56661000  |
| C  | 0.00000000  | -3.45598200 | -0.83066700 |
| C  | 1.18437100  | -3.02963700 | -1.56410800 |
| C  | 2.60986500  | -0.72613100 | -2.44086400 |
| C  | 1.42510800  | -1.16802200 | -3.16938900 |
| C  | 0.73209000  | -2.30216200 | -2.72472600 |
| C  | -0.73209000 | -2.30216200 | -2.72472600 |
| C  | -1.18437100 | -3.02963700 | -1.56410800 |
| C  | -2.33049700 | -2.60818800 | -0.85912400 |
| C  | -2.34166800 | -2.61035800 | 0.58141400  |
| C  | -3.05128600 | -1.43281600 | 1.02841100  |
| C  | -2.62187800 | -0.72231100 | 2.16435000  |
| C  | 1.43494200  | 1.16391000  | 2.91120000  |
| C  | -1.43494200 | 1.16391000  | 2.91120000  |
| C  | 2.34166800  | -2.61035800 | 0.58141400  |
| Eu | 0.00000000  | 0.00000000  | 0.77205500  |

### 3a

B3LYP/CEP121G Etot = -3295.97673117 Hartree/Minimum\_Frequency\_Value = 34.19 cm-1/Spin\_Multiplicity = 1/Point

Group = CS

|    |             |             |             |
|----|-------------|-------------|-------------|
| Yb | 0.66386900  | -1.55669600 | 0.00000000  |
| C  | 0.86258300  | 1.03328500  | 3.59961800  |
| C  | -0.40970800 | -0.90772600 | 3.70871500  |
| C  | -1.30756300 | 0.20307100  | 3.64210500  |
| C  | 1.06486100  | 4.53176100  | 0.69868800  |
| C  | -0.17926000 | 4.38074100  | 1.41724200  |
| C  | 1.06486100  | 4.53176100  | -0.69868800 |
| C  | -1.38296700 | 4.31885200  | 0.72694100  |
| C  | -0.51720200 | 1.40247400  | 3.59417000  |
| C  | 0.03503500  | 3.48984600  | 2.53209800  |
| C  | -0.97447100 | 2.58261900  | 2.94864200  |
| C  | -2.26319800 | 2.53559900  | 2.25111500  |
| C  | -3.05373300 | 1.29008300  | 2.25518800  |
| C  | -2.43767900 | 3.44312100  | 1.17670200  |
| C  | -3.93994300 | 1.05590200  | 1.17510500  |
| C  | 3.08265500  | 3.12288600  | -0.72806700 |
| C  | 3.08265500  | 3.12288600  | 0.72806700  |
| C  | 2.06694000  | 3.77233100  | -1.41584500 |
| C  | 2.06694000  | 3.77233100  | 1.41584500  |
| C  | 1.43430900  | 3.11323700  | 2.53301300  |

|   |             |             |             |
|---|-------------|-------------|-------------|
| C | 1.85023100  | 1.82333200  | 2.95244900  |
| C | 4.03525900  | -0.24952300 | 0.00000000  |
| C | 3.54907700  | 1.83346000  | -1.17529500 |
| C | 3.98095900  | 1.11992400  | 0.00000000  |
| C | 2.93792800  | 1.13784500  | 2.25102600  |
| C | 3.54907700  | 1.83346000  | 1.17529500  |
| C | 3.64468100  | -0.99086900 | 1.17334600  |
| C | 2.98881700  | -0.33661200 | 2.24960100  |
| C | 3.64468100  | -0.99086900 | -1.17334600 |
| C | 2.98881700  | -0.33661200 | -2.24960100 |
| C | 2.93792800  | 1.13784500  | -2.25102600 |
| C | 1.85023100  | 1.82333200  | -2.95244900 |
| C | 1.43430900  | 3.11323700  | -2.53301300 |
| C | 0.86258300  | 1.03328500  | -3.59961800 |
| C | 3.27425100  | -2.31969600 | -0.71882200 |
| C | 2.31044700  | -3.07084300 | -1.42425700 |
| C | 1.65732900  | -2.45250300 | -2.54978900 |
| C | 1.96330700  | -1.10759000 | -2.97534100 |
| C | 0.93835300  | -0.39837400 | -3.64191800 |
| C | 2.31044700  | -3.07084300 | 1.42425700  |
| C | 3.27425100  | -2.31969600 | 0.71882200  |
| C | 0.93835300  | -0.39837400 | 3.64191800  |
| C | 1.96330700  | -1.10759000 | 2.97534100  |
| C | 1.65732900  | -2.45250300 | 2.54978900  |
| C | -0.51720200 | 1.40247400  | -3.59417000 |
| C | -0.97447100 | 2.58261900  | -2.94864200 |
| C | 0.03503500  | 3.48984600  | -2.53209800 |
| C | -0.17926000 | 4.38074100  | -1.41724200 |
| C | -1.38296700 | 4.31885200  | -0.72694100 |
| C | -3.05373300 | 1.29008300  | -2.25518800 |
| C | -2.26319800 | 2.53559900  | -2.25111500 |
| C | -2.43767900 | 3.44312100  | -1.17670200 |
| C | -3.93994300 | 1.05590200  | -1.17510500 |
| C | -3.90149100 | 1.89106100  | 0.00000000  |
| C | -3.17126200 | 3.04778300  | 0.00000000  |
| C | -1.30756300 | 0.20307100  | -3.64210500 |
| C | -2.96730500 | -1.19879200 | -2.55899000 |
| C | -2.55925100 | 0.10789800  | -2.97690900 |
| C | 0.30211100  | -2.94223400 | -2.57317900 |
| C | -0.75047100 | -2.16106000 | -3.13151700 |
| C | -0.40970800 | -0.90772600 | -3.70871500 |
| C | -2.05017200 | -2.30679300 | -2.58567600 |
| C | -3.37760500 | -2.56118200 | -0.69902000 |
| C | -3.81905600 | -1.38620000 | -1.41508400 |

|   |             |             |             |
|---|-------------|-------------|-------------|
| C | -4.28265800 | -0.27344100 | -0.72226200 |
| C | -3.37760500 | -2.56118200 | 0.69902000  |
| C | 0.08659400  | -3.79157200 | -1.41970100 |
| C | -1.18974800 | -3.76610500 | -0.73821100 |
| C | -2.27426400 | -3.13685400 | -1.41580900 |
| C | 0.08659400  | -3.79157200 | 1.41970100  |
| C | 1.34243800  | -3.89379100 | 0.71442800  |
| C | 1.34243800  | -3.89379100 | -0.71442800 |
| C | -2.27426400 | -3.13685400 | 1.41580900  |
| C | -1.18974800 | -3.76610500 | 0.73821100  |
| C | -2.05017200 | -2.30679300 | 2.58567600  |
| C | -0.75047100 | -2.16106000 | 3.13151700  |
| C | 0.30211100  | -2.94223400 | 2.57317900  |
| C | -4.28265800 | -0.27344100 | 0.72226200  |
| C | -3.81905600 | -1.38620000 | 1.41508400  |
| C | -2.96730500 | -1.19879200 | 2.55899000  |
| C | -2.55925100 | 0.10789800  | 2.97690900  |

### 3b

B3LYP/CEP121G Etot = -3295.96761340 Hartree/Minimum\_Frequency\_Value = 28.08 cm-1/Spin\_Multiplicity = 1/Point

Group = CS

|   |             |             |             |
|---|-------------|-------------|-------------|
| C | 1.29597800  | -3.94322900 | 0.00000000  |
| C | -0.17290400 | -4.07362400 | 0.00000000  |
| C | 1.94027800  | -3.56592600 | 1.21790200  |
| C | 1.94027800  | -3.56592600 | -1.21790200 |
| C | -0.88459700 | -3.81826100 | 1.21349100  |
| C | -0.88459700 | -3.81826100 | -1.21349100 |
| C | 1.19668400  | -3.36112800 | 2.42500800  |
| C | 1.19668400  | -3.36112800 | -2.42500800 |
| C | -0.19555600 | -3.49461900 | 2.43519100  |
| C | -0.19555600 | -3.49461900 | -2.43519100 |
| C | 3.01805300  | -2.60225200 | 1.21736300  |
| C | 3.01805300  | -2.60225200 | -1.21736300 |
| C | -2.13463400 | -3.09722300 | 1.21176800  |
| C | -2.13463400 | -3.09722300 | -1.21176800 |
| C | 1.81884200  | -2.27878000 | 3.16588300  |
| C | 1.81884200  | -2.27878000 | -3.16588300 |
| C | -0.99877700 | -2.55277200 | 3.17368100  |
| C | -0.99877700 | -2.55277200 | -3.17368100 |
| C | 3.52400500  | -2.07506000 | 0.00000000  |
| C | -2.77579600 | -2.70685200 | 0.00000000  |
| C | 2.92253400  | -1.77808600 | 2.39821400  |
| C | 2.92253400  | -1.77808600 | -2.39821400 |
| C | -2.17419200 | -2.25549900 | 2.40389000  |

|   |             |             |             |
|---|-------------|-------------|-------------|
| C | -2.17419200 | -2.25549900 | -2.40389000 |
| C | 1.04361900  | -1.40276400 | 3.91437400  |
| C | 1.04361900  | -1.40276400 | -3.91437400 |
| C | -0.39523000 | -1.53820700 | 3.92032500  |
| C | -0.39523000 | -1.53820700 | -3.92032500 |
| C | 3.97476100  | -0.72584700 | 0.00000000  |
| C | -3.51128000 | -1.46050900 | 0.00000000  |
| C | 3.21237800  | -0.37804700 | 2.34388100  |
| C | 3.21237800  | -0.37804700 | -2.34388100 |
| C | -2.72979400 | -0.94435700 | 2.35770900  |
| C | -2.72979400 | -0.94435700 | -2.35770900 |
| C | 3.83654400  | 0.10314800  | 1.16387700  |
| C | 3.83654400  | 0.10314800  | -1.16387700 |
| C | -3.47826800 | -0.60031600 | 1.17127000  |
| C | -3.47826800 | -0.60031600 | -1.17127000 |
| C | 1.36812100  | 0.00787700  | 3.93377100  |
| C | 1.36812100  | 0.00787700  | -3.93377100 |
| C | -0.96990200 | -0.22042600 | 3.93207500  |
| C | -0.96990200 | -0.22042600 | -3.93207500 |
| C | 2.39730200  | 0.56223500  | 3.13256300  |
| C | 2.39730200  | 0.56223500  | -3.13256300 |
| C | -2.09153300 | 0.13363800  | 3.13297100  |
| C | -2.09153300 | 0.13363800  | -3.13297100 |
| C | 0.12340800  | 0.70913500  | 4.11470500  |
| C | 0.12340800  | 0.70913500  | -4.11470500 |
| C | 3.66120700  | 1.45288400  | 0.71636100  |
| C | 3.66120700  | 1.45288400  | -0.71636100 |
| C | -3.49365500 | 0.75784600  | 0.71683300  |
| C | -3.49365500 | 0.75784600  | -0.71683300 |
| C | 2.26034800  | 1.96448100  | 2.69488100  |
| C | 2.26034800  | 1.96448100  | -2.69488100 |
| C | -2.21819300 | 1.54000900  | 2.69805300  |
| C | -2.21819300 | 1.54000900  | -2.69805300 |
| C | -0.00059600 | 2.00944900  | 3.71181700  |
| C | -0.00059600 | 2.00944900  | -3.71181700 |
| C | 2.91933400  | 2.40765100  | 1.46251100  |
| C | 2.91933400  | 2.40765100  | -1.46251100 |
| C | -2.94503200 | 1.84927000  | 1.46748900  |
| C | -2.94503200 | 1.84927000  | -1.46748900 |
| C | 1.11328400  | 2.69245200  | 3.10554400  |
| C | 1.11328400  | 2.69245200  | -3.10554400 |
| C | -1.22839600 | 2.47087500  | 3.10607700  |
| C | -1.22839600 | 2.47087500  | -3.10607700 |
| C | 2.39494700  | 3.50211700  | 0.72474600  |



|    |             |             |             |
|----|-------------|-------------|-------------|
| C  | 2.39494700  | 3.50211700  | -0.72474600 |
| C  | -2.64355100 | 3.01807400  | 0.73048100  |
| C  | -2.64355100 | 3.01807400  | -0.73048100 |
| C  | 0.55760300  | 3.76412500  | 2.31557400  |
| C  | 0.55760300  | 3.76412500  | -2.31557400 |
| C  | -0.88970400 | 3.62349800  | 2.31486500  |
| C  | -0.88970400 | 3.62349800  | -2.31486500 |
| C  | 1.20589600  | 4.19011800  | 1.16354100  |
| C  | 1.20589600  | 4.19011800  | -1.16354100 |
| C  | -1.61546100 | 3.92578100  | -1.16548000 |
| C  | -1.61546100 | 3.92578100  | 1.16548000  |
| C  | 0.44482100  | 4.58950600  | 0.00000000  |
| C  | -0.94687400 | 4.45986200  | 0.00000000  |
| Yb | -1.16908600 | -0.65625000 | 0.00000000  |

### 3c

B3LYP/CEP121G Etot = -3295.96734124 Hartree/Minimum\_Frequency\_Value = 17.81 cm-1/Spin\_Multiplicity = 1/Point

Group = CS

|   |             |             |             |
|---|-------------|-------------|-------------|
| C | 0.00527400  | -4.38190500 | 0.73724900  |
| C | 0.00527400  | -4.38190500 | -0.73724900 |
| C | -1.20949800 | -4.06505100 | 1.41715700  |
| C | 1.21916800  | -4.06173500 | 1.41716100  |
| C | -1.20949800 | -4.06505100 | -1.41715700 |
| C | 1.21916800  | -4.06173500 | -1.41716100 |
| C | -2.42464000 | -3.79949100 | 0.69538600  |
| C | 2.43357000  | -3.79284300 | 0.69537900  |
| C | -2.42464000 | -3.79949100 | -0.69538600 |
| C | 2.43357000  | -3.79284300 | -0.69537900 |
| C | -1.21180400 | -3.21736900 | 2.57949400  |
| C | 1.21914900  | -3.21403300 | 2.57948700  |
| C | -1.21180400 | -3.21736900 | -2.57949400 |
| C | 1.21914900  | -3.21403300 | -2.57948700 |
| C | -3.16848100 | -2.78177000 | 1.41451500  |
| C | 3.17462000  | -2.77304000 | 1.41450900  |
| C | -3.16848100 | -2.78177000 | -1.41451500 |
| C | 3.17462000  | -2.77304000 | -1.41450900 |
| C | 0.00301900  | -2.73928800 | 3.13239500  |
| C | 0.00301900  | -2.73928800 | -3.13239500 |
| C | -2.39844500 | -2.38391100 | 2.55686100  |
| C | 2.40350000  | -2.37733500 | 2.55685100  |
| C | -2.39844500 | -2.38391100 | -2.55686100 |
| C | 2.40350000  | -2.37733500 | -2.55685100 |
| C | -3.92484100 | -1.84126400 | 0.72684100  |
| C | 3.92845500  | -1.83048800 | 0.72684800  |

|   |             |             |             |
|---|-------------|-------------|-------------|
| C | -3.92484100 | -1.84126400 | -0.72684100 |
| C | 3.92845500  | -1.83048800 | -0.72684800 |
| C | 0.00122100  | -1.43386700 | 3.70311000  |
| C | 0.00122100  | -1.43386700 | -3.70311000 |
| C | -2.35307200 | -1.02549400 | 2.98007500  |
| C | 2.35437600  | -1.01902700 | 2.98010100  |
| C | -2.35307200 | -1.02549400 | -2.98007500 |
| C | 2.35437600  | -1.01902700 | -2.98010100 |
| C | -1.16556000 | -0.60110300 | 3.64965900  |
| C | 1.16574200  | -0.59789900 | 3.64967800  |
| C | -1.16556000 | -0.60110300 | -3.64965900 |
| C | 1.16574200  | -0.59789900 | -3.64967800 |
| C | -3.94375000 | -0.47554400 | 1.17633800  |
| C | 3.94358000  | -0.46473700 | 1.17633600  |
| C | -3.94375000 | -0.47554400 | -1.17633800 |
| C | 3.94358000  | -0.46473700 | -1.17633600 |
| C | -3.14123800 | -0.01972000 | 2.25886700  |
| C | 3.13976900  | -0.01111100 | 2.25885600  |
| C | -3.14123800 | -0.01972000 | -2.25886700 |
| C | 3.13976900  | -0.01111100 | -2.25885600 |
| C | -4.11727800 | 0.34237200  | 0.00000000  |
| C | 4.11480800  | 0.35364200  | 0.00000000  |
| C | -0.72703600 | 0.75192000  | 3.60302600  |
| C | 0.72349800  | 0.75392900  | 3.60305000  |
| C | -0.72703600 | 0.75192000  | -3.60302600 |
| C | 0.72349800  | 0.75392900  | -3.60305000 |
| C | -2.70154500 | 1.38580000  | 2.24726600  |
| C | 2.69617900  | 1.39317200  | 2.24725200  |
| C | -2.70154500 | 1.38580000  | -2.24726600 |
| C | 2.69617900  | 1.39317200  | -2.24725200 |
| C | -3.72616700 | 1.65367100  | 0.00000000  |
| C | 3.72009200  | 1.66388800  | 0.00000000  |
| C | -1.46726600 | 1.76527700  | 2.94683400  |
| C | 1.46100400  | 1.76935200  | 2.94696900  |
| C | -1.46726600 | 1.76527700  | -2.94683400 |
| C | 1.46100400  | 1.76935200  | -2.94696900 |
| C | -3.11596500 | 2.22636500  | 1.17551700  |
| C | 3.10837700  | 2.23499500  | 1.17550000  |
| C | -3.11596500 | 2.22636500  | -1.17551700 |
| C | 3.10837700  | 2.23499500  | -1.17550000 |
| C | -0.73066500 | 2.92056100  | 2.53077400  |
| C | 0.72139400  | 2.92280400  | 2.53098900  |
| C | -0.73066500 | 2.92056100  | -2.53077400 |
| C | 0.72139400  | 2.92280400  | -2.53098900 |

|    |             |            |             |
|----|-------------|------------|-------------|
| C  | -2.32625900 | 3.34838700 | 0.72521700  |
| C  | 2.31593400  | 3.35519600 | 0.72532400  |
| C  | -2.32625900 | 3.34838700 | -0.72521700 |
| C  | 2.31593400  | 3.35519600 | -0.72532400 |
| C  | -1.17066600 | 3.74139400 | 1.42627000  |
| C  | 1.15928000  | 3.74515700 | 1.42661500  |
| C  | 1.15928000  | 3.74515700 | -1.42661500 |
| C  | -1.17066600 | 3.74139400 | -1.42627000 |
| C  | -0.00645800 | 4.24145400 | 0.71409500  |
| C  | -0.00645800 | 4.24145400 | -0.71409500 |
| Yb | 0.00246100  | 1.77351000 | 0.00000000  |

#### 4

B3LYP/CEP121G Etot = -3372.20925960 Hartree/Minimum\_Frequency\_Value = 17.47 cm-1/Spin\_Multiplicity = 1/Point

Group = C1

|   |            |             |             |
|---|------------|-------------|-------------|
| C | 4.27230400 | 0.32481600  | -0.39010000 |
| C | 4.18062300 | 1.44980700  | 0.51008500  |
| C | 4.05839300 | -0.86358300 | 0.39046400  |
| C | 3.89893300 | 0.94284900  | 1.84366100  |
| C | 3.76934600 | -0.48100200 | 1.76469700  |
| C | 3.81023200 | 0.41537400  | -1.73385200 |
| C | 3.60342400 | 2.63907000  | 0.09101200  |
| C | 3.48027200 | -2.02388800 | -0.18349100 |
| C | 3.08872600 | 1.66055800  | 2.71229200  |
| C | 3.08514100 | 2.75267900  | -1.25358300 |
| C | 3.21066100 | 1.68054800  | -2.18594000 |
| C | 3.36034300 | -0.79965000 | -2.33903000 |
| C | 2.72562200 | 3.36999600  | 0.97787800  |
| C | 3.18234900 | -1.99459900 | -1.57508500 |
| C | 2.78887400 | -1.17012100 | 2.52628800  |
| C | 2.49328000 | 2.90947000  | 2.26982800  |
| C | 2.65773200 | -2.84415400 | 0.65752400  |
| C | 2.12864900 | 0.97361300  | 3.53842400  |
| C | 2.30594600 | -2.40180900 | 1.97661500  |
| C | 1.90508700 | 3.56190000  | -1.19328100 |
| C | 2.33312900 | -0.79464000 | -3.35159600 |
| C | 1.63444700 | 3.88376800  | 0.20192600  |
| C | 1.91155500 | -0.42765900 | 3.43745300  |
| C | 2.23187800 | 1.64945300  | -3.21765500 |
| C | 2.03915800 | -2.72705900 | -2.09664000 |
| C | 1.18386100 | 3.01618100  | 2.82979500  |
| C | 1.78991700 | 0.39581800  | -3.80385600 |
| C | 1.02205200 | 1.88249000  | 3.72834800  |
| C | 1.48351700 | -1.93888100 | -3.17857600 |

|   |             |             |             |
|---|-------------|-------------|-------------|
| C | 1.58665700  | -3.65928800 | 0.14007900  |
| C | 1.11068800  | 2.53554700  | -3.21262900 |
| C | 0.86109900  | 3.42622400  | -2.12889500 |
| C | 1.01474600  | -2.92540100 | 2.28787700  |
| C | 1.23040800  | -3.55070900 | -1.26408100 |
| C | 0.31691300  | 3.94505200  | 0.70291000  |
| C | 0.56902300  | -0.95236700 | 3.74538400  |
| C | 0.56407300  | -3.73111800 | 1.17339900  |
| C | 0.08386800  | 3.50989400  | 2.08585400  |
| C | 0.39007300  | 0.48230200  | -4.11070200 |
| C | 0.11963900  | -2.21155400 | 3.15330500  |
| C | 0.01202000  | 1.84696400  | -3.85095200 |
| C | -0.22006500 | 1.39244600  | 4.02052500  |
| C | 0.07923600  | -1.84544300 | -3.38838500 |
| C | -0.44269900 | -0.02608800 | 4.12581300  |
| C | -0.51354000 | 3.68886700  | -1.69280700 |
| C | -0.17552000 | -3.60003700 | -1.58608400 |
| C | -0.51034000 | -0.58683500 | -3.84215100 |
| C | -0.78515100 | 3.93866800  | -0.27111700 |
| C | -0.84369400 | -3.77417800 | 0.84488600  |
| C | -0.72490900 | -2.74228800 | -2.61411800 |
| C | -1.25020000 | 3.04982600  | 2.48142500  |
| C | -1.39237000 | 2.02177900  | 3.45766700  |
| C | -1.19081400 | -3.75011400 | -0.55947100 |
| C | -1.26666300 | -2.43452700 | 2.92650700  |
| C | -1.27487600 | 2.15866200  | -3.51106900 |
| C | -1.82623500 | -0.23245900 | 3.80371000  |
| C | -1.55639200 | 3.16132900  | -2.49400800 |
| C | -1.73763200 | -3.15269900 | 1.75947800  |
| C | -2.40789500 | 1.02178500  | 3.35719900  |
| C | -1.90092600 | -0.25385600 | -3.48630900 |
| C | -2.08427700 | 3.67571300  | 0.21133400  |
| C | -2.23778600 | -1.41811300 | 3.21982900  |
| C | -2.30824200 | 3.17136200  | 1.55991400  |
| C | -2.06649700 | -2.41030500 | -2.25965500 |
| C | -2.27248600 | 1.11687400  | -3.43087800 |
| C | -2.35405500 | -3.02333300 | -0.99509300 |
| C | -2.84160000 | 2.84642300  | -1.95665100 |
| C | -2.68518200 | -1.18738900 | -2.67017700 |
| C | -2.95750700 | -2.50028600 | 1.31444600  |
| C | -3.11649900 | 3.13288100  | -0.62346900 |
| C | -3.26348900 | -1.42555500 | 2.20584700  |
| C | -3.38883700 | 1.05721700  | 2.32823200  |
| C | -3.38931600 | 2.23326500  | 1.52174300  |

|    |             |             |             |
|----|-------------|-------------|-------------|
| C  | -3.29720600 | 1.59584000  | -2.53853600 |
| C  | -3.25944300 | -2.40706100 | -0.07374700 |
| C  | -3.90170200 | 2.21424400  | 0.17065800  |
| C  | -3.84829300 | -0.20883400 | 1.73602700  |
| C  | -3.73145800 | -0.70069100 | -1.84111700 |
| C  | -4.01625500 | 0.70006100  | -1.76072600 |
| C  | -3.96811300 | -1.26263700 | -0.51912300 |
| C  | -4.34405700 | 1.02136000  | -0.38088700 |
| C  | -4.30648800 | -0.19969100 | 0.38766900  |
| Yb | 0.17869800  | -1.52683500 | -0.05249800 |

**5a**

B3LYP/CEP121G Etot = -3372.21267872 Hartree/Minimum\_Frequency\_Value = 9.03 cm-1/Spin\_Multiplicity = 1/Point

Group = CS

|   |             |             |             |
|---|-------------|-------------|-------------|
| C | 2.35055400  | -3.34069600 | 0.73346300  |
| C | 2.35055400  | -3.34069600 | -0.73346300 |
| C | 1.15975600  | -3.61255000 | 1.45977200  |
| C | 1.15975600  | -3.61255000 | -1.45977200 |
| C | -0.02395700 | -3.96590200 | 0.71706200  |
| C | -0.02395700 | -3.96590200 | -0.71706200 |
| C | 3.28920800  | -2.37129700 | 1.18531900  |
| C | 3.28920800  | -2.37129700 | -1.18531900 |
| C | 3.88927500  | -1.78298300 | 0.00000000  |
| C | 0.98806100  | -2.93450600 | 2.69815100  |
| C | 0.98806100  | -2.93450600 | -2.69815100 |
| C | -1.34360500 | -3.62300400 | 1.16730400  |
| C | -1.34360500 | -3.62300400 | -1.16730400 |
| C | 3.06014500  | -1.59393900 | 2.35946900  |
| C | 3.06014500  | -1.59393900 | -2.35946900 |
| C | 1.93301000  | -1.96720500 | 3.14894500  |
| C | 1.93301000  | -1.96720500 | -3.14894500 |
| C | -2.19000500 | -3.42572000 | 0.00000000  |
| C | -0.34192000 | -2.52665900 | 3.13945600  |
| C | -0.34192000 | -2.52665900 | -3.13945600 |
| C | -1.49087500 | -2.81927900 | 2.36350400  |
| C | -1.49087500 | -2.81927900 | -2.36350400 |
| C | 4.27069900  | -0.46461400 | 0.00000000  |
| C | 1.19109800  | -0.97797700 | 3.90817400  |
| C | 1.19109800  | -0.97797700 | -3.90817400 |
| C | 3.48057300  | -0.18780000 | 2.36159500  |
| C | 3.48057300  | -0.18780000 | -2.36159500 |
| C | -0.21336300 | -1.28476400 | 3.85448900  |
| C | -0.21336300 | -1.28476400 | -3.85448900 |
| C | 4.07591500  | 0.35209100  | 1.18300900  |

|   |             |             |             |
|---|-------------|-------------|-------------|
| C | 4.07591500  | 0.35209100  | -1.18300900 |
| C | -3.20802900 | -2.37994900 | 0.00000000  |
| C | -2.53965000 | -1.84859800 | 2.37213200  |
| C | -2.53965000 | -1.84859800 | -2.37213200 |
| C | -3.39756500 | -1.64558100 | 1.22143900  |
| C | -3.39756500 | -1.64558100 | -1.22143900 |
| C | 1.59954800  | 0.33499500  | 3.93299500  |
| C | 1.59954800  | 0.33499500  | -3.93299500 |
| C | 2.76918700  | 0.74350900  | 3.16440100  |
| C | 2.76918700  | 0.74350900  | -3.16440100 |
| C | -1.18570100 | -0.24772900 | 3.74046000  |
| C | -1.18570100 | -0.24772900 | -3.74046000 |
| C | 3.79424400  | 1.67127700  | 0.73178600  |
| C | 3.79424400  | 1.67127700  | -0.73178600 |
| C | -2.38323700 | -0.58991800 | 3.04553000  |
| C | -2.38323700 | -0.58991800 | -3.04553000 |
| C | -3.76845400 | -0.25000800 | 1.21993200  |
| C | -3.76845400 | -0.25000800 | -1.21993200 |
| C | 0.62744000  | 1.39914300  | 3.92369200  |
| C | 0.62744000  | 1.39914300  | -3.92369200 |
| C | 2.54387900  | 2.08457700  | 2.73598000  |
| C | 2.54387900  | 2.08457700  | -2.73598000 |
| C | 2.96651200  | 2.55644200  | 1.45836700  |
| C | 2.96651200  | 2.55644200  | -1.45836700 |
| C | -0.76145700 | 1.15130700  | 3.74539700  |
| C | -0.76145700 | 1.15130700  | -3.74539700 |
| C | -3.15551600 | 0.39241400  | 2.34370100  |
| C | -3.15551600 | 0.39241400  | -2.34370100 |
| C | -3.97247200 | 0.46356900  | 0.00000000  |
| C | 1.27181000  | 2.51136500  | 3.28806700  |
| C | 1.27181000  | 2.51136500  | -3.28806700 |
| C | 2.14721300  | 3.54096900  | 0.73271300  |
| C | 2.14721300  | 3.54096900  | -0.73271300 |
| C | -1.56156400 | 2.16713200  | 3.03914900  |
| C | -1.56156400 | 2.16713200  | -3.03914900 |
| C | -2.77354400 | 1.76594400  | 2.31355100  |
| C | -2.77354400 | 1.76594400  | -2.31355100 |
| C | -3.71631500 | 1.85138700  | 0.00000000  |
| C | 0.53277100  | 3.46242100  | 2.64010000  |
| C | 0.53277100  | 3.46242100  | -2.64010000 |
| C | 1.00902500  | 4.05754500  | 1.40000400  |
| C | 1.00902500  | 4.05754500  | -1.40000400 |
| C | -0.90500700 | 3.34688500  | 2.59521600  |
| C | -0.90500700 | 3.34688500  | -2.59521600 |

|    |             |             |             |
|----|-------------|-------------|-------------|
| C  | -3.19660000 | 2.51487000  | 1.17771500  |
| C  | -3.19660000 | 2.51487000  | -1.17771500 |
| C  | -0.15541200 | 4.50416700  | 0.69563300  |
| C  | -0.15541200 | 4.50416700  | -0.69563300 |
| C  | -1.33476100 | 4.07123900  | 1.42454500  |
| C  | -1.33476100 | 4.07123900  | -1.42454500 |
| C  | -2.45850300 | 3.65685100  | 0.72694600  |
| C  | -2.45850300 | 3.65685100  | -0.72694600 |
| Yb | -0.91471500 | -1.30775600 | 0.00000000  |

## 5b

B3LYP/CEP121G Etot = -3372.21259367 Hartree/Minimum\_Frequency\_Value = 13.37 cm-1/Spin\_Multiplicity = 1/Point

Group = C1

|   |             |             |             |
|---|-------------|-------------|-------------|
| C | -3.68674300 | 2.03107500  | -0.62792300 |
| C | -3.72575500 | 1.86330800  | 0.83100200  |
| C | -3.78651800 | 0.90503800  | -1.49137500 |
| C | -3.86432700 | 0.57155600  | 1.40936600  |
| C | -4.00971000 | -0.38309000 | -0.89859800 |
| C | -4.04737700 | -0.54672400 | 0.52838900  |
| C | -2.83517700 | 3.12642600  | -0.93246700 |
| C | -2.89802500 | 2.85566800  | 1.42195200  |
| C | -2.35870300 | 3.65485000  | 0.33489600  |
| C | -3.05444900 | 0.96421200  | -2.71158400 |
| C | -3.19767600 | 0.34633800  | 2.64770300  |
| C | -3.43666500 | -1.56255500 | -1.46464900 |
| C | -3.50114800 | -1.82957700 | 0.84252000  |
| C | -2.00242100 | 3.13466200  | -2.09172000 |
| C | -2.12829600 | 2.59522000  | 2.59521300  |
| C | -2.20478100 | 2.06848400  | -3.01341800 |
| C | -2.37212700 | 1.34859800  | 3.23876900  |
| C | -3.12881200 | -2.48589200 | -0.39370000 |
| C | -2.46292400 | -0.23947500 | -3.28212000 |
| C | -2.62973000 | -0.95896400 | 2.95749700  |
| C | -2.61401200 | -1.48847300 | -2.63739000 |
| C | -2.74310300 | -2.03209300 | 2.04311800  |
| C | -1.10359000 | 4.20000800  | 0.43101400  |
| C | -1.10573600 | 1.55186000  | -3.80880300 |
| C | -1.31399700 | 0.65962100  | 3.95300900  |
| C | -0.66320500 | 3.72671800  | -1.98912700 |
| C | -0.78798700 | 3.18681200  | 2.70021400  |
| C | -1.22954200 | 0.12352400  | -3.92651400 |
| C | -1.43347700 | -0.75640400 | 3.73313800  |
| C | -0.23695000 | 4.24632200  | -0.73095400 |
| C | -0.29942500 | 3.97592600  | 1.61741000  |

|   |             |             |             |
|---|-------------|-------------|-------------|
| C | -2.03416800 | -3.41930000 | -0.47021400 |
| C | -1.52298200 | -2.41120500 | -2.72373900 |
| C | -1.65715600 | -2.97264900 | 1.98040200  |
| C | -1.25069500 | -3.38327600 | -1.68272300 |
| C | -1.32734400 | -3.70600300 | 0.76853500  |
| C | 0.14245600  | 2.12372900  | -3.73517900 |
| C | -0.06558500 | 1.22543800  | 4.07771100  |
| C | 0.37463000  | 3.23830300  | -2.82618400 |
| C | 0.20746800  | 2.51599700  | 3.45861100  |
| C | -0.07944600 | -0.71504700 | -3.87148800 |
| C | -0.27799300 | -1.56591500 | 3.54845100  |
| C | 1.09531800  | 4.08544900  | -0.25954500 |
| C | 1.05683200  | 3.91834700  | 1.19259200  |
| C | -0.28233900 | -2.01657700 | -3.31944500 |
| C | -0.44576400 | -2.70943700 | 2.70267400  |
| C | 0.18706400  | -3.57031200 | -1.65927500 |
| C | 0.11648900  | -3.87611300 | 0.77340000  |
| C | 1.32339400  | 1.29880000  | -3.78785200 |
| C | 1.11466500  | 0.40397000  | 4.00476900  |
| C | 1.72282900  | 3.13752300  | -2.37001600 |
| C | 1.57850000  | 2.51413500  | 3.06399900  |
| C | 2.10123100  | 3.46693100  | -1.03607200 |
| C | 2.02461400  | 3.13443000  | 1.86069000  |
| C | 1.25237000  | -0.12082000 | -3.77247700 |
| C | 1.05277900  | -0.97505900 | 3.66095000  |
| C | 0.77441400  | -2.73216000 | -2.66796500 |
| C | 0.64655200  | -3.26827400 | 1.96556300  |
| C | 0.89131900  | -3.82649500 | -0.43806200 |
| C | 2.32589000  | 2.00109900  | -3.03915900 |
| C | 2.15177400  | 1.25178100  | 3.48850900  |
| C | 3.16544500  | 2.70175900  | -0.36537200 |
| C | 3.12684100  | 2.53440700  | 1.09069800  |
| C | 2.34584900  | -0.85991800 | -3.11772200 |
| C | 2.18293600  | -1.55280100 | 2.91288900  |
| C | 2.08663400  | -2.18666000 | -2.54421800 |
| C | 1.96330900  | -2.71291700 | 2.04071500  |
| C | 2.22977400  | -3.37690300 | -0.35159600 |
| C | 3.35068100  | 1.32005100  | -2.44074400 |
| C | 3.20937400  | 0.71786400  | 2.80514700  |
| C | 3.84449300  | 1.72191200  | -1.13188500 |
| C | 3.77035800  | 1.40257100  | 1.65035900  |
| C | 3.41937000  | -0.11655900 | -2.55693400 |
| C | 3.28226100  | -0.70879900 | 2.59598200  |
| C | 2.85378300  | -2.64284200 | -1.43443600 |



|    |             |             |             |
|----|-------------|-------------|-------------|
| C  | 2.79285300  | -2.91084100 | 0.90241800  |
| C  | 4.41917100  | 0.54982200  | -0.54080000 |
| C  | 4.38318200  | 0.39161500  | 0.84071600  |
| C  | 4.16120200  | -0.58387100 | -1.41163300 |
| C  | 4.08636300  | -0.90835000 | 1.41688400  |
| C  | 3.88065900  | -1.82499500 | -0.85922300 |
| C  | 3.84357800  | -1.99081100 | 0.58313800  |
| Yb | -0.57710100 | -1.44548600 | -0.02200300 |

6

B3LYP/CEP121G Etot = -3372.21607529 Hartree/Minimum\_Frequency\_Value = 23.47 cm-1/Spin\_Multiplicity = 1/Point

Group = CS

|   |             |             |             |
|---|-------------|-------------|-------------|
| C | 1.75675700  | -3.75196300 | -1.20811100 |
| C | 1.75652100  | -3.75184200 | 1.20875300  |
| C | 2.47750400  | -3.52163100 | 0.00036400  |
| C | 0.36187600  | -4.03564800 | -1.21305400 |
| C | 0.36165400  | -4.03550000 | 1.21346400  |
| C | -0.37472600 | -4.15037900 | 0.00014100  |
| C | 2.03109900  | -2.96340700 | -2.39575300 |
| C | 2.03066600  | -2.96316900 | 2.39637100  |
| C | -0.23247500 | -3.39549000 | -2.38492800 |
| C | -0.23291500 | -3.39522100 | 2.38517900  |
| C | 3.54899000  | -2.51771700 | 0.00041800  |
| C | -1.74396600 | -3.72364700 | -0.00002400 |
| C | 0.79881700  | -2.69435800 | -3.09055700 |
| C | 0.79823800  | -2.69404600 | 3.09092000  |
| C | 3.03481000  | -2.02796400 | -2.39898000 |
| C | 3.03433200  | -2.02769200 | 2.39966300  |
| C | 3.83165900  | -1.80933300 | -1.20400400 |
| C | 3.83142100  | -1.80919000 | 1.20480500  |
| C | -2.33202400 | -3.11953200 | -1.15810800 |
| C | -2.33222200 | -3.11938600 | 1.15787500  |
| C | -1.55818500 | -2.90323200 | -2.34789600 |
| C | -1.55860800 | -2.90295900 | 2.34780400  |
| C | 0.56307100  | -1.42395500 | -3.69694800 |
| C | 0.56240700  | -1.42353000 | 3.69708400  |
| C | 2.85397400  | -0.76677900 | -3.08901900 |
| C | 2.85340900  | -0.76642900 | 3.08954600  |
| C | 4.22826300  | -0.43949500 | -1.20093900 |
| C | 4.22803200  | -0.43937300 | 1.20168200  |
| C | -3.31812200 | -2.16606900 | -0.72551100 |
| C | -3.31827100 | -2.16599600 | 0.72504300  |
| C | -1.83695900 | -1.72654600 | -3.10460500 |
| C | -1.83750600 | -1.72615100 | 3.10424600  |

|   |             |             |             |
|---|-------------|-------------|-------------|
| C | 1.61396200  | -0.39889400 | -3.66795700 |
| C | 1.61327800  | -0.39846900 | 3.66818700  |
| C | 3.67794400  | 0.18292100  | -2.39621400 |
| C | 3.67751000  | 0.18318200  | 2.39680100  |
| C | 4.36656400  | 0.30717300  | 0.00034100  |
| C | -0.79137800 | -1.00230600 | -3.75697300 |
| C | -0.79205100 | -1.00183600 | 3.75674900  |
| C | -3.59477300 | -0.97250700 | -1.48001100 |
| C | -3.59516100 | -0.97231500 | 1.47934600  |
| C | -2.84823500 | -0.78321200 | -2.67997500 |
| C | -2.84873200 | -0.78286500 | 2.67938200  |
| C | -1.14679500 | 0.39674500  | -3.75516300 |
| C | -1.14749900 | 0.39720600  | 3.75482200  |
| C | 4.00120100  | 1.73605000  | 0.00023400  |
| C | 3.33946000  | 1.51373400  | -2.39806700 |
| C | 3.33900100  | 1.51400000  | 2.39841600  |
| C | 1.25002900  | 1.02814300  | -3.66859500 |
| C | 1.24933200  | 1.02856600  | 3.66863600  |
| C | -2.41432100 | 0.53037000  | -3.10501500 |
| C | -2.41494600 | 0.53075300  | 3.10445300  |
| C | -4.00136300 | 0.20926700  | -0.73091800 |
| C | -4.00158400 | 0.20931700  | 0.73006100  |
| C | 3.52145800  | 2.32400200  | -1.20156000 |
| C | 3.52123700  | 2.32413700  | 1.20186900  |
| C | 2.16030600  | 1.94884700  | -3.09010200 |
| C | 2.15974100  | 1.94920500  | 3.09020300  |
| C | -0.16337800 | 1.41954200  | -3.69643500 |
| C | -0.16407300 | 1.41997900  | 3.69615300  |
| C | -2.74049000 | 1.69425900  | -2.34945500 |
| C | -2.74090800 | 1.69449000  | 2.34857700  |
| C | -3.54444300 | 1.51036500  | -1.16172800 |
| C | -3.54483700 | 1.51058900  | 1.16082800  |
| C | 2.51517200  | 3.33464200  | -1.20503800 |
| C | 2.51493200  | 3.33477500  | 1.20505700  |
| C | 1.71094800  | 3.14021500  | -2.39978900 |
| C | 1.71050700  | 3.14050700  | 2.39968500  |
| C | -0.56943300 | 2.64532400  | -3.08857400 |
| C | -0.57003100 | 2.64578300  | 3.08819700  |
| C | -3.28918400 | 2.31386300  | -0.00045300 |
| C | 1.92737200  | 3.81959700  | -0.00008200 |
| C | -1.81256900 | 2.76184200  | -2.38277400 |
| C | -1.81300900 | 2.76209400  | 2.38200500  |
| C | 0.38020000  | 3.47778100  | -2.39717400 |
| C | 0.37974700  | 3.47805200  | 2.39679000  |

|    |             |             |             |
|----|-------------|-------------|-------------|
| C  | -2.29471100 | 3.35549100  | -0.00044200 |
| C  | -1.59731500 | 3.61066900  | -1.21312400 |
| C  | -1.59750700 | 3.61078400  | 1.21232400  |
| C  | 0.50393400  | 4.18220600  | -0.00022700 |
| C  | -0.23785300 | 4.03666000  | -1.20951000 |
| C  | -0.23805400 | 4.03679800  | 1.20893200  |
| Yb | -1.61886200 | -0.04970500 | 0.00020400  |

**7a**

B3LYP/CEP121G Etot = -3448.43349680 Hartree/Minimum\_Frequency\_Value = 11.06 cm-1/Spin\_Multiplicity = 1/Point

Group = C1

|    |             |             |             |
|----|-------------|-------------|-------------|
| Yb | 1.65180900  | 0.19065900  | -0.00770100 |
| C  | -3.97380900 | -1.41353700 | 1.04615400  |
| C  | -4.01265100 | -1.87333400 | -0.31229000 |
| C  | -3.92918600 | -0.95404000 | -1.40076000 |
| C  | -4.18978300 | 0.39333600  | -1.08463100 |
| C  | -4.35435400 | 0.82752300  | 0.27296200  |
| C  | -4.05749600 | -0.04399700 | 1.36330200  |
| C  | -3.31083700 | 0.45161200  | 2.51456300  |
| C  | -2.38885900 | -0.45616900 | 3.21230700  |
| C  | -2.26900900 | -1.86309100 | 2.81250200  |
| C  | -3.16366500 | -2.33138200 | 1.82038300  |
| C  | -2.83932700 | -3.43844100 | 0.96766100  |
| C  | -3.34136500 | -3.14052700 | -0.36181800 |
| C  | -2.60046400 | -3.47124900 | -1.47935100 |
| C  | -2.48161400 | -2.54254400 | -2.58474700 |
| C  | -3.07123400 | -1.24824200 | -2.54357400 |
| C  | -2.39489600 | -0.13979000 | -3.23285900 |
| C  | -2.63080200 | 1.25278900  | -2.83427700 |
| C  | -3.62338500 | 1.48394400  | -1.85167700 |
| C  | -3.59088700 | 2.63533800  | -0.99658100 |
| C  | -4.01785600 | 2.22120900  | 0.32777800  |
| C  | -3.39335700 | 2.72345000  | 1.45256800  |
| C  | -3.05988300 | 1.85148900  | 2.56027800  |
| C  | -1.85741800 | 2.36949300  | 3.13928300  |
| C  | -1.00284000 | 1.52087200  | 3.80968900  |
| C  | -1.29160200 | 0.11454200  | 3.89328700  |
| C  | -0.02786500 | -0.56668300 | 4.02961600  |
| C  | 0.14979900  | -1.89099500 | 3.57314500  |
| C  | -1.00303100 | -2.58709200 | 3.00038400  |
| C  | -0.73074500 | -3.70243500 | 2.15575800  |
| C  | -1.63375600 | -4.10027000 | 1.12043900  |
| C  | -0.85510400 | -4.46615200 | -0.05675100 |
| C  | -1.32285100 | -4.15366100 | -1.32003700 |

|   |             |             |             |
|---|-------------|-------------|-------------|
| C | -0.41404200 | -3.64427700 | -2.31016400 |
| C | -1.18243200 | -2.74655900 | -3.15055200 |
| C | -0.55733400 | -1.71237800 | -3.81372100 |
| C | -1.18369100 | -0.42091900 | -3.90181500 |
| C | -0.12649300 | 0.55199300  | -4.02565900 |
| C | -0.28629800 | 1.87859200  | -3.56894300 |
| C | -1.58133800 | 2.26776100  | -3.00995500 |
| C | -1.60110400 | 3.41406200  | -2.16308300 |
| C | -2.58473100 | 3.57484100  | -1.13758600 |
| C | -1.93327400 | 4.12072300  | 0.04689400  |
| C | -2.32209400 | 3.70044900  | 1.30551300  |
| C | -1.32599600 | 3.43047700  | 2.30564200  |
| C | 0.06347300  | 3.51803500  | 2.02878300  |
| C | 0.95777700  | 2.65300000  | 2.81108900  |
| C | 0.41230800  | 1.71024900  | 3.72250900  |
| C | 1.01879100  | 0.41443100  | 3.92540900  |
| C | 2.26840900  | 0.09033600  | 3.33796900  |
| C | 2.49922600  | -1.26875100 | 2.99589900  |
| C | 1.47463200  | -2.25302800 | 3.16709400  |
| C | 1.67658000  | -3.24397600 | 2.14945200  |
| C | 0.60686300  | -3.96064400 | 1.65984900  |
| C | 0.53713400  | -4.29191100 | 0.25531100  |
| C | 1.45285200  | -3.72736700 | -0.67875100 |
| C | 0.95078700  | -3.38502800 | -2.01817800 |
| C | 1.61171800  | -2.32505000 | -2.79202200 |
| C | 0.85986600  | -1.54589300 | -3.71074900 |
| C | 1.12917300  | -0.13993100 | -3.90860500 |
| C | 2.25373600  | 0.48222400  | -3.30904000 |
| C | 2.13759700  | 1.85557100  | -2.96656900 |
| C | 0.90369700  | 2.55672900  | -3.15020900 |
| C | 0.84486500  | 3.56641600  | -2.13220800 |
| C | -0.37408000 | 3.99475800  | -1.65423700 |
| C | -0.53813000 | 4.29690700  | -0.25062200 |
| C | 0.47900400  | 3.97560600  | 0.69375600  |
| C | 1.78417900  | 3.56946400  | 0.16077400  |
| C | 2.65708700  | 2.78912200  | 0.98126400  |
| C | 2.24462500  | 2.34047100  | 2.27447800  |
| C | 2.90841400  | 1.09740900  | 2.54528000  |
| C | 3.75255100  | 0.76860600  | 1.42275900  |
| C | 3.90351900  | -0.61344400 | 1.01690100  |
| C | 3.29316200  | -1.61286400 | 1.82893100  |
| C | 2.73014800  | -2.82277300 | 1.27020400  |
| C | 2.61231700  | -3.01259400 | -0.13308000 |
| C | 3.27695300  | -2.04095100 | -0.94616100 |

|   |            |             |             |
|---|------------|-------------|-------------|
| C | 2.77651000 | -1.70487400 | -2.24266200 |
| C | 3.11656000 | -0.33641100 | -2.50931800 |
| C | 3.84544500 | 0.18846600  | -1.38039400 |
| C | 3.63946200 | 1.56419000  | -0.97334900 |
| C | 2.81001400 | 2.38384700  | -1.79225000 |
| C | 1.96070100 | 3.41740900  | -1.24136800 |
| C | 3.60387700 | 1.83351100  | 0.44470800  |
| C | 3.95605300 | -0.88235600 | -0.40208100 |

## 7b

B3LYP/CEP121G Etot = -3448.40659329 Hartree/Minimum\_Frequency\_Value = 21.56 cm-1/Spin\_Multiplicity = 1/Point

Group = C1

|    |             |             |             |
|----|-------------|-------------|-------------|
| Yb | 1.73467200  | -0.39560200 | 0.05092800  |
| C  | -0.04129500 | -3.91195600 | -1.11291600 |
| C  | -0.43782300 | -4.14734100 | 0.24983700  |
| C  | 0.37903200  | -3.71633600 | 1.33706200  |
| C  | 1.72381000  | -3.41709100 | 1.01488400  |
| C  | 2.18186200  | -3.38068400 | -0.34697500 |
| C  | 1.24771800  | -3.43761200 | -1.43290300 |
| C  | 1.39836200  | -2.53885600 | -2.56873100 |
| C  | 0.19624400  | -2.04711900 | -3.25384200 |
| C  | -1.13998600 | -2.50306400 | -2.85208000 |
| C  | -1.20795500 | -3.52657200 | -1.87279100 |
| C  | -2.34500500 | -3.67819100 | -1.01167100 |
| C  | -1.86639400 | -4.03818500 | 0.30902000  |
| C  | -2.45343500 | -3.49538100 | 1.43927600  |
| C  | -1.64618200 | -3.04176300 | 2.54711200  |
| C  | -0.22187700 | -3.06916000 | 2.49514700  |
| C  | 0.52927800  | -2.01944700 | 3.19489300  |
| C  | 1.89467600  | -1.67325300 | 2.78767700  |
| C  | 2.51842600  | -2.49429400 | 1.79251800  |
| C  | 3.57915600  | -2.00578400 | 0.94474600  |
| C  | 3.34420000  | -2.53496500 | -0.39536500 |
| C  | 3.54720900  | -1.73512700 | -1.52487700 |
| C  | 2.59952700  | -1.75482000 | -2.61799800 |
| C  | 2.58981300  | -0.43638800 | -3.18011500 |
| C  | 1.46384500  | 0.02642000  | -3.82091700 |
| C  | 0.27866600  | -0.80173100 | -3.91862200 |
| C  | -0.83870500 | 0.08284100  | -4.04480400 |
| C  | -2.12399200 | -0.28640700 | -3.57902400 |
| C  | -2.30233000 | -1.62691000 | -3.02510800 |
| C  | -3.42863600 | -1.82868400 | -2.16924100 |
| C  | -3.42879800 | -2.82531300 | -1.14699400 |
| C  | -4.06741600 | -2.27049600 | 0.04067900  |

|   |             |             |             |
|---|-------------|-------------|-------------|
| C | -3.59154600 | -2.59330500 | 1.30015200  |
| C | -3.48191300 | -1.56985700 | 2.29740700  |
| C | -2.34029800 | -1.93176200 | 3.12825900  |
| C | -1.64412200 | -0.95793800 | 3.80137400  |
| C | -0.20295100 | -1.02416100 | 3.88668400  |
| C | 0.26464300  | 0.31846200  | 4.03315400  |
| C | 1.54171200  | 0.70935500  | 3.56648300  |
| C | 2.41016500  | -0.31373800 | 2.98423100  |
| C | 3.49449400  | 0.13586400  | 2.13889500  |
| C | 4.06195300  | -0.69544200 | 1.10756200  |
| C | 4.28839600  | 0.14207100  | -0.07397600 |
| C | 4.02831500  | -0.36290500 | -1.35618500 |
| C | 3.35888400  | 0.46061900  | -2.32990800 |
| C | 2.87271300  | 1.76703200  | -2.02466700 |
| C | 1.72880400  | 2.27460700  | -2.80648700 |
| C | 1.07604900  | 1.39655900  | -3.72494200 |
| C | -0.35070000 | 1.43683300  | -3.91735900 |
| C | -1.13689300 | 2.44756500  | -3.30873000 |
| C | -2.47588400 | 2.10523300  | -2.95978300 |
| C | -2.97318200 | 0.77891000  | -3.15290200 |
| C | -3.95770800 | 0.55823100  | -2.12704300 |
| C | -4.19182100 | -0.70936600 | -1.65845200 |
| C | -4.46262000 | -0.92278100 | -0.24798000 |
| C | -4.30843400 | 0.12783500  | 0.69584300  |
| C | -3.78961100 | -0.21285100 | 2.02991600  |
| C | -3.08758600 | 0.81139000  | 2.82376200  |
| C | -2.05709000 | 0.40853100  | 3.73206300  |
| C | -0.87810400 | 1.20180100  | 3.92871300  |
| C | -0.75966600 | 2.49268700  | 3.34738400  |
| C | 0.55095100  | 2.93468400  | 3.00468500  |
| C | 1.68572400  | 2.07477900  | 3.16679000  |
| C | 2.62295600  | 2.42915500  | 2.13958800  |
| C | 3.52147400  | 1.49587400  | 1.65378300  |
| C | 3.86087700  | 1.48687700  | 0.24636300  |
| C | 3.13379700  | 2.30520200  | -0.68134400 |
| C | 2.24328100  | 3.34156400  | -0.13440900 |
| C | 1.19966500  | 3.84481500  | -0.95048500 |
| C | 0.95198300  | 3.32679300  | -2.26622300 |
| C | -0.46140900 | 3.42335800  | -2.51756900 |
| C | -1.08618500 | 3.99151600  | -1.35712700 |
| C | -2.38924600 | 3.56613100  | -0.94523900 |
| C | -3.10382700 | 2.67077500  | -1.78400200 |
| C | -3.98995900 | 1.68513600  | -1.23483600 |
| C | -4.11574300 | 1.48577500  | 0.17039900  |

|   |             |            |             |
|---|-------------|------------|-------------|
| C | -3.49137500 | 2.45503800 | 0.99781200  |
| C | -2.99594200 | 2.12445200 | 2.30858700  |
| C | -1.85930000 | 2.96442500 | 2.57507800  |
| C | -1.64217300 | 3.79375100 | 1.42380500  |
| C | -0.32153400 | 4.14601600 | 1.01394200  |
| C | 0.76837500  | 3.76446000 | 1.84290300  |
| C | 2.04410700  | 3.41670900 | 1.27753100  |
| C | -0.06295200 | 4.25242600 | -0.39157600 |
| C | -2.65938700 | 3.48983900 | 0.45604000  |

**La@C<sub>60</sub>\_hexagon**

B3LYP/CEP121G Etot = -2317.64623148 Hartree/Minimum\_Frequency\_Value = 44.69 cm-1/Spin\_Multiplicity = 2/Point

Group = C1

|   |             |             |             |
|---|-------------|-------------|-------------|
| C | -3.30255900 | -0.75466900 | 0.79632400  |
| C | -2.53426200 | -1.46140300 | 1.81372900  |
| C | -1.84206500 | -0.77769000 | 2.85291500  |
| C | -1.84632700 | 0.69853300  | 2.87112800  |
| C | -2.54251100 | 1.40310400  | 1.84793000  |
| C | -3.30699700 | 0.71716500  | 0.81430700  |
| C | -3.10435000 | -1.46122900 | -0.46613400 |
| C | -2.24505600 | -2.61847000 | -0.21551900 |
| C | -1.90742500 | -2.62658400 | 1.19504000  |
| C | -0.63694100 | -3.06672300 | 1.62812800  |
| C | -0.55296200 | -1.22781200 | 3.28130200  |
| C | -0.55969000 | 1.14490400  | 3.30963600  |
| C | 0.04011600  | 2.30517500  | 2.74482300  |
| C | -0.65379700 | 3.02205800  | 1.70064600  |
| C | -1.92192000 | 2.58609800  | 1.25730600  |
| C | -2.25981600 | 2.61073200  | -0.15322200 |
| C | -3.11243500 | 1.45498100  | -0.43150200 |
| C | -2.92949000 | 0.75144200  | -1.68244100 |
| C | -2.92563000 | -0.72697500 | -1.70048700 |
| C | -1.28542000 | -3.05377000 | -1.17285500 |
| C | -1.11830500 | -2.32283300 | -2.41586900 |
| C | -1.91419000 | -1.15584500 | -2.63767300 |
| C | -1.29953900 | 0.03487300  | -3.20805400 |
| C | -1.92032200 | 1.20824900  | -2.60920700 |
| C | -1.13091100 | 2.37347400  | -2.35944500 |
| C | -1.30227400 | 3.07427700  | -1.09975400 |
| C | -0.00462800 | 3.51612600  | -0.64074500 |
| C | 0.31845400  | 3.49873100  | 0.72969800  |
| C | 0.25592300  | -0.04238400 | 3.55061700  |
| C | 3.36849000  | 1.43088700  | 0.47654500  |
| C | 3.19754100  | 0.71657600  | 1.67514500  |

|    |             |             |             |
|----|-------------|-------------|-------------|
| C  | 3.20162400  | -0.73958600 | 1.65753600  |
| C  | 3.37660100  | -1.42381200 | 0.44229000  |
| C  | 3.55088000  | -0.68552300 | -0.79333000 |
| C  | 2.84481000  | 1.45363000  | -1.80849300 |
| C  | 2.22711500  | 2.62137400  | -1.19375600 |
| C  | 2.56080600  | 2.60759200  | 0.22410700  |
| C  | 1.62027000  | 3.04040600  | 1.16631000  |
| C  | 1.44332700  | 2.29858400  | 2.41056400  |
| C  | 2.22551700  | 1.15572200  | 2.64857700  |
| C  | 2.23190600  | -1.20738400 | 2.62017600  |
| C  | 1.45638700  | -2.34842300 | 2.35482100  |
| C  | 1.63730800  | -3.05899600 | 1.09316700  |
| C  | 2.57554000  | -2.59888200 | 0.16165100  |
| C  | 2.24165600  | -2.57996400 | -1.25619400 |
| C  | 2.85257300  | -1.39431500 | -1.84245400 |
| C  | 2.16713000  | -0.69142700 | -2.84387700 |
| C  | 2.16330800  | 0.77105400  | -2.82649600 |
| C  | 0.97726400  | 3.06918100  | -1.62052500 |
| C  | 0.26943200  | 2.36392100  | -2.68343900 |
| C  | 0.86838800  | 1.22509200  | -3.27089300 |
| C  | 0.06685200  | 0.04257400  | -3.53216300 |
| C  | 0.87488500  | -1.14165100 | -3.29912200 |
| C  | 0.28184600  | -2.29717100 | -2.73881400 |
| C  | 0.99394700  | -3.02391900 | -1.69330200 |
| C  | 0.01484900  | -3.49954800 | -0.72456600 |
| C  | 0.33786600  | -3.51395200 | 0.64575800  |
| C  | 1.61185500  | -0.03460000 | 3.22623700  |
| C  | 0.05287800  | -2.37100600 | 2.68890600  |
| C  | 3.54699200  | 0.72366500  | -0.77633400 |
| La | -0.97836900 | -0.00143500 | -0.01985800 |

#### Ce@C<sub>60</sub>\_66\_bond

B3LYP/CEP121G Etot = -2324.96286900 Hartree/Minimum\_Frequency\_Value = 39.42 cm-1/Spin\_Multiplicity = 3/Point

Group = C2v

|   |             |            |             |
|---|-------------|------------|-------------|
| C | -2.33011500 | 2.60836400 | -0.84303700 |
| C | -2.34104300 | 2.61050200 | 0.59746900  |
| C | -1.18622100 | 3.03037800 | 1.31495800  |
| C | 0.00000000  | 3.45735900 | 0.58280500  |
| C | 0.00000000  | 3.45768800 | -0.81520800 |
| C | -1.18426700 | 3.03102200 | -1.54861500 |
| C | -3.05176400 | 1.42974400 | -1.30256500 |
| C | -3.50720100 | 0.69820300 | -0.13014200 |
| C | -3.05113200 | 1.43256600 | 1.04476900  |
| C | -2.62297800 | 0.72257000 | 2.18174800  |



|   |             |             |             |
|---|-------------|-------------|-------------|
| C | -0.74056400 | 2.31063000  | 2.47515800  |
| C | 1.18622100  | 3.03037800  | 1.31495800  |
| C | 2.34104300  | 2.61050200  | 0.59746900  |
| C | 2.33011500  | 2.60836400  | -0.84303700 |
| C | 1.18426700  | 3.03102200  | -1.54861500 |
| C | 0.73216000  | 2.30316300  | -2.70924800 |
| C | -0.73216000 | 2.30316300  | -2.70924800 |
| C | -1.42524400 | 1.16836100  | -3.15312000 |
| C | -2.61020800 | 0.72619900  | -2.42494900 |
| C | -3.50720100 | -0.69820300 | -0.13014200 |
| C | -3.05176400 | -1.42974400 | -1.30256500 |
| C | -2.61020800 | -0.72619900 | -2.42494900 |
| C | -1.42524400 | -1.16836100 | -3.15312000 |
| C | -0.70746400 | 0.00000000  | -3.60980000 |
| C | 0.70746400  | 0.00000000  | -3.60980000 |
| C | 1.42524400  | 1.16836100  | -3.15312000 |
| C | 2.61020800  | 0.72619900  | -2.42494900 |
| C | 3.05176400  | 1.42974400  | -1.30256500 |
| C | 0.74056400  | 2.31063000  | 2.47515800  |
| C | 3.05113200  | -1.43256600 | 1.04476900  |
| C | 2.62297800  | -0.72257000 | 2.18174800  |
| C | 1.43453300  | -1.16397000 | 2.92690100  |
| C | 0.74056400  | -2.31063000 | 2.47515800  |
| C | 1.18622100  | -3.03037800 | 1.31495800  |
| C | 2.33011500  | -2.60836400 | -0.84303700 |
| C | 3.05176400  | -1.42974400 | -1.30256500 |
| C | 3.50720100  | -0.69820300 | -0.13014200 |
| C | 3.50720100  | 0.69820300  | -0.13014200 |
| C | 3.05113200  | 1.43256600  | 1.04476900  |
| C | 2.62297800  | 0.72257000  | 2.18174800  |
| C | 0.72778600  | 0.00000000  | 3.41478700  |
| C | -0.72778600 | 0.00000000  | 3.41478700  |
| C | -1.43453300 | -1.16397000 | 2.92690100  |
| C | -0.74056400 | -2.31063000 | 2.47515800  |
| C | -1.18622100 | -3.03037800 | 1.31495800  |
| C | 0.00000000  | -3.45735900 | 0.58280500  |
| C | 0.00000000  | -3.45768800 | -0.81520800 |
| C | 1.18426700  | -3.03102200 | -1.54861500 |
| C | 2.61020800  | -0.72619900 | -2.42494900 |
| C | 1.42524400  | -1.16836100 | -3.15312000 |
| C | 0.73216000  | -2.30316300 | -2.70924800 |
| C | -0.73216000 | -2.30316300 | -2.70924800 |
| C | -1.18426700 | -3.03102200 | -1.54861500 |
| C | -2.33011500 | -2.60836400 | -0.84303700 |

|    |             |             |            |
|----|-------------|-------------|------------|
| C  | -2.34104300 | -2.61050200 | 0.59746900 |
| C  | -3.05113200 | -1.43256600 | 1.04476900 |
| C  | -2.62297800 | -0.72257000 | 2.18174800 |
| C  | 1.43453300  | 1.16397000  | 2.92690100 |
| C  | -1.43453300 | 1.16397000  | 2.92690100 |
| C  | 2.34104300  | -2.61050200 | 0.59746900 |
| Ce | 0.00000000  | 0.00000000  | 0.73836400 |

**Pr@C<sub>60</sub>\_66\_bond**

B3LYP/CEP121G Etot = -2333.48504811 Hartree/Minimum\_Frequency\_Value = 23.26 cm-1/Spin\_Multiplicity = 4/Point

Group = C2v

|   |             |             |             |
|---|-------------|-------------|-------------|
| C | -2.33089000 | 2.60827600  | -0.83809900 |
| C | -2.34170600 | 2.61063600  | 0.60224000  |
| C | -1.18662800 | 3.03027900  | 1.31908200  |
| C | 0.00000000  | 3.45658100  | 0.58702200  |
| C | 0.00000000  | 3.45636400  | -0.81049800 |
| C | -1.18453800 | 3.03003000  | -1.54396900 |
| C | -3.05173400 | 1.42970600  | -1.29754800 |
| C | -3.50729300 | 0.69817400  | -0.12478700 |
| C | -3.05233300 | 1.43284500  | 1.05010100  |
| C | -2.62462600 | 0.72279700  | 2.18669100  |
| C | -0.74066100 | 2.30914000  | 2.47783800  |
| C | 1.18662800  | 3.03027900  | 1.31908200  |
| C | 2.34170600  | 2.61063600  | 0.60224000  |
| C | 2.33089000  | 2.60827600  | -0.83809900 |
| C | 1.18453800  | 3.03003000  | -1.54396900 |
| C | 0.73235700  | 2.30231900  | -2.70415300 |
| C | -0.73235700 | 2.30231900  | -2.70415300 |
| C | -1.42524600 | 1.16780600  | -3.14908900 |
| C | -2.61023000 | 0.72599400  | -2.41990200 |
| C | -3.50729300 | -0.69817400 | -0.12478700 |
| C | -3.05173400 | -1.42970600 | -1.29754800 |
| C | -2.61023000 | -0.72599400 | -2.41990200 |
| C | -1.42524600 | -1.16780600 | -3.14908900 |
| C | -0.70806600 | 0.00000000  | -3.60743600 |
| C | 0.70806600  | 0.00000000  | -3.60743600 |
| C | 1.42524600  | 1.16780600  | -3.14908900 |
| C | 2.61023000  | 0.72599400  | -2.41990200 |
| C | 3.05173400  | 1.42970600  | -1.29754800 |
| C | 0.74066100  | 2.30914000  | 2.47783800  |
| C | 3.05233300  | -1.43284500 | 1.05010100  |
| C | 2.62462600  | -0.72279700 | 2.18669100  |
| C | 1.43485800  | -1.16399600 | 2.92905200  |
| C | 0.74066100  | -2.30914000 | 2.47783800  |

|    |             |             |             |
|----|-------------|-------------|-------------|
| C  | 1.18662800  | -3.03027900 | 1.31908200  |
| C  | 2.33089000  | -2.60827600 | -0.83809900 |
| C  | 3.05173400  | -1.42970600 | -1.29754800 |
| C  | 3.50729300  | -0.69817400 | -0.12478700 |
| C  | 3.50729300  | 0.69817400  | -0.12478700 |
| C  | 3.05233300  | 1.43284500  | 1.05010100  |
| C  | 2.62462600  | 0.72279700  | 2.18669100  |
| C  | 0.72664100  | 0.00000000  | 3.41272300  |
| C  | -0.72664100 | 0.00000000  | 3.41272300  |
| C  | -1.43485800 | -1.16399600 | 2.92905200  |
| C  | -0.74066100 | -2.30914000 | 2.47783800  |
| C  | -1.18662800 | -3.03027900 | 1.31908200  |
| C  | 0.00000000  | -3.45658100 | 0.58702200  |
| C  | 0.00000000  | -3.45636400 | -0.81049800 |
| C  | 1.18453800  | -3.03003000 | -1.54396900 |
| C  | 2.61023000  | -0.72599400 | -2.41990200 |
| C  | 1.42524600  | -1.16780600 | -3.14908900 |
| C  | 0.73235700  | -2.30231900 | -2.70415300 |
| C  | -0.73235700 | -2.30231900 | -2.70415300 |
| C  | -1.18453800 | -3.03003000 | -1.54396900 |
| C  | -2.33089000 | -2.60827600 | -0.83809900 |
| C  | -2.34170600 | -2.61063600 | 0.60224000  |
| C  | -3.05233300 | -1.43284500 | 1.05010100  |
| C  | -2.62462600 | -0.72279700 | 2.18669100  |
| C  | 1.43485800  | 1.16399600  | 2.92905200  |
| C  | -1.43485800 | 1.16399600  | 2.92905200  |
| C  | 2.34170600  | -2.61063600 | 0.60224000  |
| Pr | 0.00000000  | 0.00000000  | 0.70032700  |

#### Nd@C<sub>60</sub>\_66\_bond

B3LYP/CEP121G Etot = -2343.41179919 Hartree/Minimum\_Frequency\_Value = 31.86 cm<sup>-1</sup>/Spin\_Multiplicity = 5/Point

Group = C2v

|   |             |             |             |
|---|-------------|-------------|-------------|
| C | -3.09857600 | 1.19051600  | 0.95996200  |
| C | -3.46466400 | 0.34354600  | -0.16033500 |
| C | -3.30928300 | -1.09656000 | -0.03904500 |
| C | -2.79746000 | -1.65420600 | 1.18832500  |
| C | -2.46410300 | -0.82972500 | 2.29095200  |
| C | -2.61560600 | 0.63807400  | 2.16636000  |
| C | -2.46866200 | 2.41392900  | 0.44432600  |
| C | -2.41410700 | 2.29849200  | -0.99471200 |
| C | -3.01516200 | 1.00669500  | -1.36133400 |
| C | -2.44682700 | 0.27875400  | -2.43519500 |
| C | -2.70482900 | -1.83583500 | -1.13059400 |
| C | -1.91404000 | -2.78412900 | 0.86413900  |

|   |             |             |             |
|---|-------------|-------------|-------------|
| C | -0.76764000 | -3.03104100 | 1.63591800  |
| C | -0.43952700 | -2.18871400 | 2.76805200  |
| C | -1.29067200 | -1.08946500 | 3.07174800  |
| C | -0.70172500 | 0.19987000  | 3.42325000  |
| C | -1.53685500 | 1.26358800  | 2.88347900  |
| C | -0.93222800 | 2.45347300  | 2.38999700  |
| C | -1.40801600 | 3.01889500  | 1.15019400  |
| C | -1.30238300 | 2.78942800  | -1.70565000 |
| C | -0.20902700 | 3.42510200  | -0.97643800 |
| C | -0.26054800 | 3.53580800  | 0.41394700  |
| C | 0.92745800  | 3.26999400  | 1.21182100  |
| C | 0.50358400  | 2.59681800  | 2.43063000  |
| C | 1.30711300  | 1.56981700  | 2.96258900  |
| C | 0.68714300  | 0.34759200  | 3.46276000  |
| C | 1.55613600  | -0.77857800 | 3.15636200  |
| C | 0.98849500  | -2.02484600 | 2.80652400  |
| C | -1.86100100 | -2.90032400 | -0.57614800 |
| C | 2.71344900  | -2.39069700 | -0.44852800 |
| C | 1.67139400  | -3.00557100 | -1.14674400 |
| C | 1.18386700  | -2.43211500 | -2.39106500 |
| C | 1.77688100  | -1.25196000 | -2.88383300 |
| C | 2.85547800  | -0.61993400 | -2.16086100 |
| C | 3.66623200  | -0.31964600 | 0.15671900  |
| C | 3.24401000  | -0.98937300 | 1.36394500  |
| C | 2.65908400  | -2.27585300 | 0.99758200  |
| C | 1.56389100  | -2.77960700 | 1.70224100  |
| C | 0.47474700  | -3.41573400 | 0.97594800  |
| C | 0.52625000  | -3.52560000 | -0.41482300 |
| C | -0.24843800 | -2.59711000 | -2.43303900 |
| C | -1.06407200 | -1.56392500 | -2.96463300 |
| C | -0.44745200 | -0.34092400 | -3.46357600 |
| C | 0.94049600  | -0.19073900 | -3.42511300 |
| C | 1.53006600  | 1.09684000  | -3.07358000 |
| C | 2.70389900  | 0.83133500  | -2.28218300 |
| C | 3.03366300  | 1.65438900  | -1.19392600 |
| C | 3.51922000  | 1.08295400  | 0.03982400  |
| C | 2.68703400  | -0.26315600 | 2.42705800  |
| C | 2.53543200  | 1.18889700  | 2.30710600  |
| C | 2.94532300  | 1.83569900  | 1.13417000  |
| C | 2.11478900  | 2.89789900  | 0.57828200  |
| C | 2.16818900  | 2.78268600  | -0.86922200 |
| C | 1.03073900  | 3.04343000  | -1.63535200 |
| C | 0.69137700  | 2.18814600  | -2.76479000 |
| C | -0.74083300 | 2.04497800  | -2.80981100 |

|    |             |             |             |
|----|-------------|-------------|-------------|
| C  | -1.31732900 | 0.78824900  | -3.15484600 |
| C  | -0.66184400 | -3.26120900 | -1.21641100 |
| C  | -2.28924700 | -1.18821600 | -2.31168000 |
| C  | 3.32722300  | -1.17087800 | -0.96365200 |
| Nd | -0.73405100 | -0.02802200 | 0.00229100  |

**Pm@C<sub>60</sub>\_66\_bond**

B3LYP/CEP121G Etot = -2354.72442011 Hartree/Minimum\_Frequency\_Value = 17.09 cm-1/Spin\_Multiplicity = 6/Point

Group = C2v

|   |             |             |             |
|---|-------------|-------------|-------------|
| C | -2.33057400 | 2.60812800  | -0.85100000 |
| C | -2.34176400 | 2.61030900  | 0.58938400  |
| C | -1.18674900 | 3.02975600  | 1.30656500  |
| C | 0.00000000  | 3.45544900  | 0.57455000  |
| C | 0.00000000  | 3.45608100  | -0.82278500 |
| C | -1.18440000 | 3.02972900  | -1.55625100 |
| C | -3.05166400 | 1.42959900  | -1.31069100 |
| C | -3.50721000 | 0.69811900  | -0.13798400 |
| C | -3.05208500 | 1.43296500  | 1.03654800  |
| C | -2.62285700 | 0.72241000  | 2.17247800  |
| C | -0.74091800 | 2.30864600  | 2.46494800  |
| C | 1.18674900  | 3.02975600  | 1.30656500  |
| C | 2.34176400  | 2.61030900  | 0.58938400  |
| C | 2.33057400  | 2.60812800  | -0.85100000 |
| C | 1.18440000  | 3.02972900  | -1.55625100 |
| C | 0.73220600  | 2.30225900  | -2.71678900 |
| C | -0.73220600 | 2.30225900  | -2.71678900 |
| C | -1.42518800 | 1.16800700  | -3.16153300 |
| C | -2.61009900 | 0.72615000  | -2.43286100 |
| C | -3.50721000 | -0.69811900 | -0.13798400 |
| C | -3.05166400 | -1.42959900 | -1.31069100 |
| C | -2.61009900 | -0.72615000 | -2.43286100 |
| C | -1.42518800 | -1.16800700 | -3.16153300 |
| C | -0.70768000 | 0.00000000  | -3.61936500 |
| C | 0.70768000  | 0.00000000  | -3.61936500 |
| C | 1.42518800  | 1.16800700  | -3.16153300 |
| C | 2.61009900  | 0.72615000  | -2.43286100 |
| C | 3.05166400  | 1.42959900  | -1.31069100 |
| C | 0.74091800  | 2.30864600  | 2.46494800  |
| C | 3.05208500  | -1.43296500 | 1.03654800  |
| C | 2.62285700  | -0.72241000 | 2.17247800  |
| C | 1.43538500  | -1.16400900 | 2.91783200  |
| C | 0.74091800  | -2.30864600 | 2.46494800  |
| C | 1.18674900  | -3.02975600 | 1.30656500  |
| C | 2.33057400  | -2.60812800 | -0.85100000 |

|    |             |             |             |
|----|-------------|-------------|-------------|
| C  | 3.05166400  | -1.42959900 | -1.31069100 |
| C  | 3.50721000  | -0.69811900 | -0.13798400 |
| C  | 3.50721000  | 0.69811900  | -0.13798400 |
| C  | 3.05208500  | 1.43296500  | 1.03654800  |
| C  | 2.62285700  | 0.72241000  | 2.17247800  |
| C  | 0.72770500  | 0.00000000  | 3.40492100  |
| C  | -0.72770500 | 0.00000000  | 3.40492100  |
| C  | -1.43538500 | -1.16400900 | 2.91783200  |
| C  | -0.74091800 | -2.30864600 | 2.46494800  |
| C  | -1.18674900 | -3.02975600 | 1.30656500  |
| C  | 0.00000000  | -3.45544900 | 0.57455000  |
| C  | 0.00000000  | -3.45608100 | -0.82278500 |
| C  | 1.18440000  | -3.02972900 | -1.55625100 |
| C  | 2.61009900  | -0.72615000 | -2.43286100 |
| C  | 1.42518800  | -1.16800700 | -3.16153300 |
| C  | 0.73220600  | -2.30225900 | -2.71678900 |
| C  | -0.73220600 | -2.30225900 | -2.71678900 |
| C  | -1.18440000 | -3.02972900 | -1.55625100 |
| C  | -2.33057400 | -2.60812800 | -0.85100000 |
| C  | -2.34176400 | -2.61030900 | 0.58938400  |
| C  | -3.05208500 | -1.43296500 | 1.03654800  |
| C  | -2.62285700 | -0.72241000 | 2.17247800  |
| C  | 1.43538500  | 1.16400900  | 2.91783200  |
| C  | -1.43538500 | 1.16400900  | 2.91783200  |
| C  | 2.34176400  | -2.61030900 | 0.58938400  |
| Pm | 0.00000000  | 0.00000000  | 0.75174800  |

### Sm@C<sub>60</sub>\_hexagon

B3LYP/CEP121G Etot = -2367.61102076 Hartree/Minimum\_Frequency\_Value = 35.69 cm-1/Spin\_Multiplicity = 7/Point

Group = C2v

|   |             |            |             |
|---|-------------|------------|-------------|
| C | -2.33062100 | 2.60842200 | -0.85627200 |
| C | -2.34154600 | 2.61036300 | 0.58432400  |
| C | -1.18656400 | 3.02971100 | 1.30162800  |
| C | 0.00000000  | 3.45572000 | 0.56947900  |
| C | 0.00000000  | 3.45634800 | -0.82779000 |
| C | -1.18437400 | 3.02987200 | -1.56127900 |
| C | -3.05156300 | 1.42975200 | -1.31589300 |
| C | -3.50652700 | 0.69805100 | -0.14330400 |
| C | -3.05126400 | 1.43280200 | 1.03134500  |
| C | -2.62219300 | 0.72230500 | 2.16745900  |
| C | -0.74092500 | 2.30956500 | 2.46081700  |
| C | 1.18656400  | 3.02971100 | 1.30162800  |
| C | 2.34154600  | 2.61036300 | 0.58432400  |
| C | 2.33062100  | 2.60842200 | -0.85627200 |

|   |             |             |             |
|---|-------------|-------------|-------------|
| C | 1.18437400  | 3.02987200  | -1.56127900 |
| C | 0.73219500  | 2.30250000  | -2.72196200 |
| C | -0.73219500 | 2.30250000  | -2.72196200 |
| C | -1.42513500 | 1.16812400  | -3.16645500 |
| C | -2.61007700 | 0.72618500  | -2.43801700 |
| C | -3.50652700 | -0.69805100 | -0.14330400 |
| C | -3.05156300 | -1.42975200 | -1.31589300 |
| C | -2.61007700 | -0.72618500 | -2.43801700 |
| C | -1.42513500 | -1.16812400 | -3.16645500 |
| C | -0.70755500 | 0.00000000  | -3.62385900 |
| C | 0.70755500  | 0.00000000  | -3.62385900 |
| C | 1.42513500  | 1.16812400  | -3.16645500 |
| C | 2.61007700  | 0.72618500  | -2.43801700 |
| C | 3.05156300  | 1.42975200  | -1.31589300 |
| C | 0.74092500  | 2.30956500  | 2.46081700  |
| C | 3.05126400  | -1.43280200 | 1.03134500  |
| C | 2.62219300  | -0.72230500 | 2.16745900  |
| C | 1.43471900  | -1.16388900 | 2.91328200  |
| C | 0.74092500  | -2.30956500 | 2.46081700  |
| C | 1.18656400  | -3.02971100 | 1.30162800  |
| C | 2.33062100  | -2.60842200 | -0.85627200 |
| C | 3.05156300  | -1.42975200 | -1.31589300 |
| C | 3.50652700  | -0.69805100 | -0.14330400 |
| C | 3.50652700  | 0.69805100  | -0.14330400 |
| C | 3.05126400  | 1.43280200  | 1.03134500  |
| C | 2.62219300  | 0.72230500  | 2.16745900  |
| C | 0.72783800  | 0.00000000  | 3.40236400  |
| C | -0.72783800 | 0.00000000  | 3.40236400  |
| C | -1.43471900 | -1.16388900 | 2.91328200  |
| C | -0.74092500 | -2.30956500 | 2.46081700  |
| C | -1.18656400 | -3.02971100 | 1.30162800  |
| C | 0.00000000  | -3.45572000 | 0.56947900  |
| C | 0.00000000  | -3.45634800 | -0.82779000 |
| C | 1.18437400  | -3.02987200 | -1.56127900 |
| C | 2.61007700  | -0.72618500 | -2.43801700 |
| C | 1.42513500  | -1.16812400 | -3.16645500 |
| C | 0.73219500  | -2.30250000 | -2.72196200 |
| C | -0.73219500 | -2.30250000 | -2.72196200 |
| C | -1.18437400 | -3.02987200 | -1.56127900 |
| C | -2.33062100 | -2.60842200 | -0.85627200 |
| C | -2.34154600 | -2.61036300 | 0.58432400  |
| C | -3.05126400 | -1.43280200 | 1.03134500  |
| C | -2.62219300 | -0.72230500 | 2.16745900  |
| C | 1.43471900  | 1.16388900  | 2.91328200  |

|    |             |             |            |
|----|-------------|-------------|------------|
| C  | -1.43471900 | 1.16388900  | 2.91328200 |
| C  | 2.34154600  | -2.61036300 | 0.58432400 |
| Sm | 0.00000000  | 0.00000000  | 0.76808900 |

**Tb@C<sub>60</sub>\_66\_bond**

B3LYP/CEP121G Etot = -2415.92215204 Hartree/Minimum\_Frequency\_Value = 41.00 cm-1/Spin\_Multiplicity = 6/Point

Group = C1

|   |             |             |             |
|---|-------------|-------------|-------------|
| C | -2.91578800 | 0.69540000  | -1.67774000 |
| C | -2.82065400 | -0.78065100 | -1.81196900 |
| C | -2.97814900 | -1.59418000 | -0.65697000 |
| C | -3.25415700 | -1.01528600 | 0.63427800  |
| C | -3.35618800 | 0.43167300  | 0.76803300  |
| C | -3.16878900 | 1.26570600  | -0.40583200 |
| C | -1.94852000 | 1.28683800  | -2.56551600 |
| C | -1.24107800 | 0.20133400  | -3.22679900 |
| C | -1.79409400 | -1.07041400 | -2.77126400 |
| C | -0.92657800 | -2.19003800 | -2.61226200 |
| C | -2.06640800 | -2.73658800 | -0.47853200 |
| C | -2.47617300 | -1.75830500 | 1.61059100  |
| C | -1.84645800 | -1.11760800 | 2.69449700  |
| C | -1.94469300 | 0.35014600  | 2.82857300  |
| C | -2.67252800 | 1.08404300  | 1.86359500  |
| C | -2.11394100 | 2.35629800  | 1.38988600  |
| C | -2.41854100 | 2.47103200  | -0.01653800 |
| C | -1.47707500 | 3.04480300  | -0.89761400 |
| C | -1.23683700 | 2.46637800  | -2.19655500 |
| C | 0.12438200  | 0.31385300  | -3.51015900 |
| C | 0.84994100  | 1.52285200  | -3.13582100 |
| C | 0.17325900  | 2.57062100  | -2.48208200 |
| C | 0.81771100  | 3.23892800  | -1.35974400 |
| C | -0.20831900 | 3.53707200  | -0.37227100 |
| C | 0.07885700  | 3.43099900  | 0.98932900  |
| C | -0.88728700 | 2.82563400  | 1.89935500  |
| C | -0.16397500 | 2.07347900  | 2.89658600  |
| C | -0.69990500 | 0.83545000  | 3.34673700  |
| C | -1.76611100 | -2.84415200 | 0.93127800  |
| C | 2.24922800  | -1.28133600 | 2.56802400  |
| C | 1.55454600  | -2.44771600 | 2.19458100  |
| C | 1.80622000  | -3.04028800 | 0.89068000  |
| C | 2.72664800  | -2.45503400 | 0.01767600  |
| C | 3.44649900  | -1.24873000 | 0.40864300  |
| C | 3.10997800  | 0.77383000  | 1.79583100  |
| C | 2.09476400  | 1.07181200  | 2.77543300  |
| C | 1.54479900  | -0.19850800 | 3.23769200  |



|    |             |             |             |
|----|-------------|-------------|-------------|
| C  | 0.18195300  | -0.31319300 | 3.51673400  |
| C  | -0.53942100 | -1.52164900 | 3.13510900  |
| C  | 0.14597300  | -2.57594500 | 2.48240700  |
| C  | 0.54050400  | -3.53512500 | 0.37186100  |
| C  | 0.25262200  | -3.42875200 | -0.99033600 |
| C  | 1.21475300  | -2.82466400 | -1.89946400 |
| C  | 2.42643300  | -2.34529400 | -1.39870600 |
| C  | 2.97008400  | -1.07549000 | -1.87267000 |
| C  | 3.60743000  | -0.41053100 | -0.76144400 |
| C  | 3.51750400  | 0.99444800  | -0.63385900 |
| C  | 3.26596800  | 1.58424800  | 0.66126400  |
| C  | 1.24413800  | 2.18102800  | 2.60584700  |
| C  | 1.40388300  | 3.02322900  | 1.42831200  |
| C  | 2.38620700  | 2.73169600  | 0.48042500  |
| C  | 2.08717000  | 2.84057800  | -0.93803900 |
| C  | 2.78532900  | 1.75698100  | -1.62042500 |
| C  | 2.16332000  | 1.11490300  | -2.69953000 |
| C  | 2.25675100  | -0.34047100 | -2.83079500 |
| C  | 1.00510900  | -0.83123300 | -3.35053400 |
| C  | 0.47569400  | -2.06132700 | -2.89596800 |
| C  | -0.48526900 | -3.23511500 | 1.36103600  |
| C  | -1.07463600 | -3.01766900 | -1.43165500 |
| C  | 3.20335100  | -0.68011200 | 1.66389700  |
| Tb | -0.85194800 | -0.00922000 | 0.00488400  |

### Dy@C<sub>60</sub>\_66\_bond

B3LYP/CEP121G Etot = -2435.52265070 Hartree/Minimum\_Frequency\_Value = 22.62 cm<sup>-1</sup>/Spin\_Multiplicity = 5/Point

Group = C2v

|   |             |            |             |
|---|-------------|------------|-------------|
| C | -2.32997100 | 2.60797900 | -0.88166000 |
| C | -2.34164600 | 2.60949600 | 0.55904300  |
| C | -1.18611900 | 3.02631700 | 1.27641600  |
| C | 0.00000000  | 3.45273000 | 0.54456300  |
| C | 0.00000000  | 3.45596600 | -0.85243100 |
| C | -1.18422100 | 3.02950200 | -1.58592800 |
| C | -3.05140300 | 1.42958000 | -1.34154600 |
| C | -3.50590000 | 0.69792400 | -0.16889000 |
| C | -3.05018900 | 1.43249400 | 1.00538300  |
| C | -2.61866700 | 0.72164400 | 2.14099800  |
| C | -0.74118400 | 2.30747700 | 2.43626800  |
| C | 1.18611900  | 3.02631700 | 1.27641600  |
| C | 2.34164600  | 2.60949600 | 0.55904300  |
| C | 2.32997100  | 2.60797900 | -0.88166000 |
| C | 1.18422100  | 3.02950200 | -1.58592800 |
| C | 0.73185400  | 2.30223100 | -2.74693000 |

|   |             |             |             |
|---|-------------|-------------|-------------|
| C | -0.73185400 | 2.30223100  | -2.74693000 |
| C | -1.42503800 | 1.16847100  | -3.19153800 |
| C | -2.60925900 | 0.72629900  | -2.46320500 |
| C | -3.50590000 | -0.69792400 | -0.16889000 |
| C | -3.05140300 | -1.42958000 | -1.34154600 |
| C | -2.60925900 | -0.72629900 | -2.46320500 |
| C | -1.42503800 | -1.16847100 | -3.19153800 |
| C | -0.70695200 | 0.00000000  | -3.64858000 |
| C | 0.70695200  | 0.00000000  | -3.64858000 |
| C | 1.42503800  | 1.16847100  | -3.19153800 |
| C | 2.60925900  | 0.72629900  | -2.46320500 |
| C | 3.05140300  | 1.42958000  | -1.34154600 |
| C | 0.74118400  | 2.30747700  | 2.43626800  |
| C | 3.05018900  | -1.43249400 | 1.00538300  |
| C | 2.61866700  | -0.72164400 | 2.14099800  |
| C | 1.43545900  | -1.16344900 | 2.89319000  |
| C | 0.74118400  | -2.30747700 | 2.43626800  |
| C | 1.18611900  | -3.02631700 | 1.27641600  |
| C | 2.32997100  | -2.60797900 | -0.88166000 |
| C | 3.05140300  | -1.42958000 | -1.34154600 |
| C | 3.50590000  | -0.69792400 | -0.16889000 |
| C | 3.50590000  | 0.69792400  | -0.16889000 |
| C | 3.05018900  | 1.43249400  | 1.00538300  |
| C | 2.61866700  | 0.72164400  | 2.14099800  |
| C | 0.72994400  | 0.00000000  | 3.39030300  |
| C | -0.72994400 | 0.00000000  | 3.39030300  |
| C | -1.43545900 | -1.16344900 | 2.89319000  |
| C | -0.74118400 | -2.30747700 | 2.43626800  |
| C | -1.18611900 | -3.02631700 | 1.27641600  |
| C | 0.00000000  | -3.45273000 | 0.54456300  |
| C | 0.00000000  | -3.45596600 | -0.85243100 |
| C | 1.18422100  | -3.02950200 | -1.58592800 |
| C | 2.60925900  | -0.72629900 | -2.46320500 |
| C | 1.42503800  | -1.16847100 | -3.19153800 |
| C | 0.73185400  | -2.30223100 | -2.74693000 |
| C | -0.73185400 | -2.30223100 | -2.74693000 |
| C | -1.18422100 | -3.02950200 | -1.58592800 |
| C | -2.32997100 | -2.60797900 | -0.88166000 |
| C | -2.34164600 | -2.60949600 | 0.55904300  |
| C | -3.05018900 | -1.43249400 | 1.00538300  |
| C | -2.61866700 | -0.72164400 | 2.14099800  |
| C | 1.43545900  | 1.16344900  | 2.89319000  |
| C | -1.43545900 | 1.16344900  | 2.89319000  |
| C | 2.34164600  | -2.60949600 | 0.55904300  |

Dy 0.00000000 0.00000000 0.85508000

**Ho@C<sub>60</sub>\_66\_bond**

B3LYP/CEP121G Etot = -2457.00961703 Hartree/Minimum\_Frequency\_Value = 34.25 cm<sup>-1</sup>/Spin\_Multiplicity = 4/Point

Group = C2v

|   |             |             |             |
|---|-------------|-------------|-------------|
| C | -2.32991200 | 2.60826000  | -0.88921700 |
| C | -2.34123700 | 2.60948800  | 0.55152000  |
| C | -1.18594100 | 3.02620100  | 1.26887600  |
| C | 0.00000000  | 3.45283100  | 0.53711800  |
| C | 0.00000000  | 3.45641700  | -0.85990900 |
| C | -1.18419900 | 3.02985200  | -1.59343500 |
| C | -3.05113700 | 1.42973100  | -1.34887600 |
| C | -3.50484200 | 0.69787400  | -0.17611100 |
| C | -3.04887800 | 1.43232100  | 0.99791000  |
| C | -2.61733000 | 0.72158400  | 2.13380900  |
| C | -0.74113700 | 2.30693100  | 2.42847500  |
| C | 1.18594100  | 3.02620100  | 1.26887600  |
| C | 2.34123700  | 2.60948800  | 0.55152000  |
| C | 2.32991200  | 2.60826000  | -0.88921700 |
| C | 1.18419900  | 3.02985200  | -1.59343500 |
| C | 0.73190000  | 2.30250800  | -2.75434000 |
| C | -0.73190000 | 2.30250800  | -2.75434000 |
| C | -1.42498400 | 1.16859500  | -3.19868400 |
| C | -2.60906000 | 0.72636100  | -2.47043600 |
| C | -3.50484200 | -0.69787400 | -0.17611100 |
| C | -3.05113700 | -1.42973100 | -1.34887600 |
| C | -2.60906000 | -0.72636100 | -2.47043600 |
| C | -1.42498400 | -1.16859500 | -3.19868400 |
| C | -0.70683700 | 0.00000000  | -3.65536500 |
| C | 0.70683700  | 0.00000000  | -3.65536500 |
| C | 1.42498400  | 1.16859500  | -3.19868400 |
| C | 2.60906000  | 0.72636100  | -2.47043600 |
| C | 3.05113700  | 1.42973100  | -1.34887600 |
| C | 0.74113700  | 2.30693100  | 2.42847500  |
| C | 3.04887800  | -1.43232100 | 0.99791000  |
| C | 2.61733000  | -0.72158400 | 2.13380900  |
| C | 1.43489400  | -1.16331900 | 2.88699100  |
| C | 0.74113700  | -2.30693100 | 2.42847500  |
| C | 1.18594100  | -3.02620100 | 1.26887600  |
| C | 2.32991200  | -2.60826000 | -0.88921700 |
| C | 3.05113700  | -1.42973100 | -1.34887600 |
| C | 3.50484200  | -0.69787400 | -0.17611100 |
| C | 3.50484200  | 0.69787400  | -0.17611100 |
| C | 3.04887800  | 1.43232100  | 0.99791000  |

|    |             |             |             |
|----|-------------|-------------|-------------|
| C  | 2.61733000  | 0.72158400  | 2.13380900  |
| C  | 0.73042700  | 0.00000000  | 3.38778700  |
| C  | -0.73042700 | 0.00000000  | 3.38778700  |
| C  | -1.43489400 | -1.16331900 | 2.88699100  |
| C  | -0.74113700 | -2.30693100 | 2.42847500  |
| C  | -1.18594100 | -3.02620100 | 1.26887600  |
| C  | 0.00000000  | -3.45283100 | 0.53711800  |
| C  | 0.00000000  | -3.45641700 | -0.85990900 |
| C  | 1.18419900  | -3.02985200 | -1.59343500 |
| C  | 2.60906000  | -0.72636100 | -2.47043600 |
| C  | 1.42498400  | -1.16859500 | -3.19868400 |
| C  | 0.73190000  | -2.30250800 | -2.75434000 |
| C  | -0.73190000 | -2.30250800 | -2.75434000 |
| C  | -1.18419900 | -3.02985200 | -1.59343500 |
| C  | -2.32991200 | -2.60826000 | -0.88921700 |
| C  | -2.34123700 | -2.60948800 | 0.55152000  |
| C  | -3.04887800 | -1.43232100 | 0.99791000  |
| C  | -2.61733000 | -0.72158400 | 2.13380900  |
| C  | 1.43489400  | 1.16331900  | 2.88699100  |
| C  | -1.43489400 | 1.16331900  | 2.88699100  |
| C  | 2.34123700  | -2.60948800 | 0.55152000  |
| Ho | 0.00000000  | 0.00000000  | 0.88072900  |

#### Er@C<sub>60</sub>\_66\_bond

B3LYP/CEP121G Etot = -2480.46009324 Hartree/Minimum\_Frequency\_Value = 34.22 cm-1/Spin\_Multiplicity = 3/Point

Group = C2v

|   |             |             |             |
|---|-------------|-------------|-------------|
| C | -3.38134400 | -0.72067200 | -0.17219000 |
| C | -2.92750100 | -1.47898700 | 0.97918200  |
| C | -2.51515800 | -0.83678500 | 2.16897600  |
| C | -2.51636800 | 0.64488500  | 2.23776100  |
| C | -2.92854000 | 1.39053700  | 1.10536600  |
| C | -3.37948900 | 0.73904300  | -0.10473700 |
| C | -2.83504100 | -1.37290300 | -1.34308000 |
| C | -2.10014600 | -2.57557900 | -0.92489000 |
| C | -2.15884900 | -2.64268800 | 0.51564200  |
| C | -1.05088000 | -3.10825400 | 1.25012700  |
| C | -1.38233400 | -1.31627100 | 2.91183800  |
| C | -1.38250400 | 1.05272200  | 3.01557600  |
| C | -0.64680700 | 2.22417000  | 2.68026000  |
| C | -1.04622000 | 2.98360000  | 1.51714800  |
| C | -2.15392700 | 2.58838600  | 0.74532300  |
| C | -2.09620500 | 2.65375400  | -0.69555000 |
| C | -2.82901900 | 1.49321700  | -1.21693800 |
| C | -2.32657000 | 0.84970200  | -2.36851700 |

|    |             |             |             |
|----|-------------|-------------|-------------|
| C  | -2.32961500 | -0.63036800 | -2.43659200 |
| C  | -0.93782500 | -2.97690600 | -1.60885500 |
| C  | -0.44474700 | -2.21983500 | -2.73614400 |
| C  | -1.14442100 | -1.04502800 | -3.12841400 |
| C  | -0.39439800 | 0.15651200  | -3.47443400 |
| C  | -1.13944600 | 1.32444300  | -3.02368400 |
| C  | -0.44056000 | 2.45807200  | -2.52876400 |
| C  | -0.93282200 | 3.11491100  | -1.34135000 |
| C  | 0.21192900  | 3.53340600  | -0.54234000 |
| C  | 0.15655100  | 3.46914900  | 0.85055300  |
| C  | -0.66775800 | -0.15252000 | 3.41798800  |
| C  | 3.15735800  | 1.36373700  | 1.34988000  |
| C  | 2.66712400  | 0.62224100  | 2.43418200  |
| C  | 2.66595200  | -0.84005600 | 2.36800600  |
| C  | 3.15392600  | -1.48309200 | 1.22355000  |
| C  | 3.65756300  | -0.71505400 | 0.10596200  |
| C  | 3.24758000  | 1.46747500  | -0.98334100 |
| C  | 2.50497600  | 2.63339700  | -0.51869100 |
| C  | 2.44686600  | 2.56740600  | 0.93152700  |
| C  | 1.29812000  | 2.97997300  | 1.60805800  |
| C  | 0.79142300  | 2.20916400  | 2.73529900  |
| C  | 1.47956900  | 1.04409900  | 3.13412500  |
| C  | 1.47639300  | -1.32233700 | 3.02813900  |
| C  | 0.78985700  | -2.44618700 | 2.52862100  |
| C  | 1.29521800  | -3.11595500 | 1.33895700  |
| C  | 2.44364300  | -2.64491900 | 0.70086900  |
| C  | 2.50076000  | -2.57929400 | -0.74938800 |
| C  | 3.24764100  | -1.37965900 | -1.10996000 |
| C  | 2.84881300  | -0.63543000 | -2.22945100 |
| C  | 2.84953400  | 0.82662100  | -2.16295900 |
| C  | 1.41308400  | 3.11004500  | -1.24599200 |
| C  | 1.00048700  | 2.44259500  | -2.47154700 |
| C  | 1.71800700  | 1.31492900  | -2.91546100 |
| C  | 1.00124900  | 0.15243900  | -3.42278400 |
| C  | 1.71677300  | -1.05113600 | -3.02026600 |
| C  | 0.99423900  | -2.21206500 | -2.67731500 |
| C  | 1.40673100  | -2.98610900 | -1.51458600 |
| C  | 0.20613800  | -3.46921400 | -0.85011500 |
| C  | 0.15114200  | -3.53304900 | 0.54281300  |
| C  | 0.72819600  | -0.15551000 | 3.47678700  |
| C  | -0.65064800 | -2.45420600 | 2.47264200  |
| C  | 3.65791500  | 0.69688600  | 0.17019600  |
| Er | -0.89520100 | -0.00065700 | -0.00238400 |

**Tm@C<sub>60</sub>\_66\_bond**B3LYP/CEP121G Etot = -2505.99559876 Hartree/Minimum\_Frequency\_Value = 31.11 cm<sup>-1</sup>/Spin\_Multiplicity = 2/Point

Group = C2v

|   |             |             |             |
|---|-------------|-------------|-------------|
| C | -2.32982600 | 2.60823700  | -0.89885900 |
| C | -2.34165900 | 2.60964200  | 0.54198800  |
| C | -1.18571400 | 3.02467100  | 1.25918900  |
| C | 0.00000000  | 3.45211500  | 0.52771000  |
| C | 0.00000000  | 3.45605700  | -0.86914900 |
| C | -1.18422200 | 3.02968300  | -1.60272800 |
| C | -3.05100900 | 1.42964400  | -1.35859800 |
| C | -3.50430000 | 0.69774800  | -0.18580300 |
| C | -3.04825400 | 1.43230100  | 0.98824700  |
| C | -2.61607600 | 0.72138700  | 2.12383800  |
| C | -0.74122300 | 2.30640000  | 2.41928800  |
| C | 1.18571400  | 3.02467100  | 1.25918900  |
| C | 2.34165900  | 2.60964200  | 0.54198800  |
| C | 2.32982600  | 2.60823700  | -0.89885900 |
| C | 1.18422200  | 3.02968300  | -1.60272800 |
| C | 0.73180300  | 2.30242700  | -2.76379200 |
| C | -0.73180300 | 2.30242700  | -2.76379200 |
| C | -1.42492600 | 1.16869000  | -3.20799900 |
| C | -2.60900800 | 0.72643600  | -2.48013700 |
| C | -3.50430000 | -0.69774800 | -0.18580300 |
| C | -3.05100900 | -1.42964400 | -1.35859800 |
| C | -2.60900800 | -0.72643600 | -2.48013700 |
| C | -1.42492600 | -1.16869000 | -3.20799900 |
| C | -0.70660200 | 0.00000000  | -3.66450200 |
| C | 0.70660200  | 0.00000000  | -3.66450200 |
| C | 1.42492600  | 1.16869000  | -3.20799900 |
| C | 2.60900800  | 0.72643600  | -2.48013700 |
| C | 3.05100900  | 1.42964400  | -1.35859800 |
| C | 0.74122300  | 2.30640000  | 2.41928800  |
| C | 3.04825400  | -1.43230100 | 0.98824700  |
| C | 2.61607600  | -0.72138700 | 2.12383800  |
| C | 1.43455400  | -1.16281900 | 2.87884600  |
| C | 0.74122300  | -2.30640000 | 2.41928800  |
| C | 1.18571400  | -3.02467100 | 1.25918900  |
| C | 2.32982600  | -2.60823700 | -0.89885900 |
| C | 3.05100900  | -1.42964400 | -1.35859800 |
| C | 3.50430000  | -0.69774800 | -0.18580300 |
| C | 3.50430000  | 0.69774800  | -0.18580300 |
| C | 3.04825400  | 1.43230100  | 0.98824700  |
| C | 2.61607600  | 0.72138700  | 2.12383800  |
| C | 0.73109900  | 0.00000000  | 3.38243000  |

|    |             |             |             |
|----|-------------|-------------|-------------|
| C  | -0.73109900 | 0.00000000  | 3.38243000  |
| C  | -1.43455400 | -1.16281900 | 2.87884600  |
| C  | -0.74122300 | -2.30640000 | 2.41928800  |
| C  | -1.18571400 | -3.02467100 | 1.25918900  |
| C  | 0.00000000  | -3.45211500 | 0.52771000  |
| C  | 0.00000000  | -3.45605700 | -0.86914900 |
| C  | 1.18422200  | -3.02968300 | -1.60272800 |
| C  | 2.60900800  | -0.72643600 | -2.48013700 |
| C  | 1.42492600  | -1.16869000 | -3.20799900 |
| C  | 0.73180300  | -2.30242700 | -2.76379200 |
| C  | -0.73180300 | -2.30242700 | -2.76379200 |
| C  | -1.18422200 | -3.02968300 | -1.60272800 |
| C  | -2.32982600 | -2.60823700 | -0.89885900 |
| C  | -2.34165900 | -2.60964200 | 0.54198800  |
| C  | -3.04825400 | -1.43230100 | 0.98824700  |
| C  | -2.61607600 | -0.72138700 | 2.12383800  |
| C  | 1.43455400  | 1.16281900  | 2.87884600  |
| C  | -1.43455400 | 1.16281900  | 2.87884600  |
| C  | 2.34165900  | -2.60964200 | 0.54198800  |
| Tm | 0.00000000  | 0.00000000  | 0.90374800  |

#### Yb@C<sub>60</sub>\_66\_bond

B3LYP/CEP121G Etot = -2533.71386488 Hartree/Minimum\_Frequency\_Value = 35.48 cm-1/Spin\_Multiplicity = 1/Point

Group = C2v

|   |             |             |             |
|---|-------------|-------------|-------------|
| C | -2.32967700 | 2.60835800  | -0.90496400 |
| C | -2.34152800 | 2.60989400  | 0.53597700  |
| C | -1.18600700 | 3.02564400  | 1.25328800  |
| C | 0.00000000  | 3.45268000  | 0.52182500  |
| C | 0.00000000  | 3.45654100  | -0.87496600 |
| C | -1.18412700 | 3.02969000  | -1.60851700 |
| C | -3.05073200 | 1.42960100  | -1.36464500 |
| C | -3.50383600 | 0.69771800  | -0.19176100 |
| C | -3.04798200 | 1.43271000  | 0.98197400  |
| C | -2.61500000 | 0.72109600  | 2.11704500  |
| C | -0.74116400 | 2.30617900  | 2.41233200  |
| C | 1.18600700  | 3.02564400  | 1.25328800  |
| C | 2.34152800  | 2.60989400  | 0.53597700  |
| C | 2.32967700  | 2.60835800  | -0.90496400 |
| C | 1.18412700  | 3.02969000  | -1.60851700 |
| C | 0.73167700  | 2.30240000  | -2.76968500 |
| C | -0.73167700 | 2.30240000  | -2.76968500 |
| C | -1.42491800 | 1.16880800  | -3.21382800 |
| C | -2.60875600 | 0.72651300  | -2.48613700 |
| C | -3.50383600 | -0.69771800 | -0.19176100 |

|    |             |             |             |
|----|-------------|-------------|-------------|
| C  | -3.05073200 | -1.42960100 | -1.36464500 |
| C  | -2.60875600 | -0.72651300 | -2.48613700 |
| C  | -1.42491800 | -1.16880800 | -3.21382800 |
| C  | -0.70635800 | 0.00000000  | -3.67024400 |
| C  | 0.70635800  | 0.00000000  | -3.67024400 |
| C  | 1.42491800  | 1.16880800  | -3.21382800 |
| C  | 2.60875600  | 0.72651300  | -2.48613700 |
| C  | 3.05073200  | 1.42960100  | -1.36464500 |
| C  | 0.74116400  | 2.30617900  | 2.41233200  |
| C  | 3.04798200  | -1.43271000 | 0.98197400  |
| C  | 2.61500000  | -0.72109600 | 2.11704500  |
| C  | 1.43431600  | -1.16294400 | 2.87330300  |
| C  | 0.74116400  | -2.30617900 | 2.41233200  |
| C  | 1.18600700  | -3.02564400 | 1.25328800  |
| C  | 2.32967700  | -2.60835800 | -0.90496400 |
| C  | 3.05073200  | -1.42960100 | -1.36464500 |
| C  | 3.50383600  | -0.69771800 | -0.19176100 |
| C  | 3.50383600  | 0.69771800  | -0.19176100 |
| C  | 3.04798200  | 1.43271000  | 0.98197400  |
| C  | 2.61500000  | 0.72109600  | 2.11704500  |
| C  | 0.73146300  | 0.00000000  | 3.37787200  |
| C  | -0.73146300 | 0.00000000  | 3.37787200  |
| C  | -1.43431600 | -1.16294400 | 2.87330300  |
| C  | -0.74116400 | -2.30617900 | 2.41233200  |
| C  | -1.18600700 | -3.02564400 | 1.25328800  |
| C  | 0.00000000  | -3.45268000 | 0.52182500  |
| C  | 0.00000000  | -3.45654100 | -0.87496600 |
| C  | 1.18412700  | -3.02969000 | -1.60851700 |
| C  | 2.60875600  | -0.72651300 | -2.48613700 |
| C  | 1.42491800  | -1.16880800 | -3.21382800 |
| C  | 0.73167700  | -2.30240000 | -2.76968500 |
| C  | -0.73167700 | -2.30240000 | -2.76968500 |
| C  | -1.18412700 | -3.02969000 | -1.60851700 |
| C  | -2.32967700 | -2.60835800 | -0.90496400 |
| C  | -2.34152800 | -2.60989400 | 0.53597700  |
| C  | -3.04798200 | -1.43271000 | 0.98197400  |
| C  | -2.61500000 | -0.72109600 | 2.11704500  |
| C  | 1.43431600  | 1.16294400  | 2.87330300  |
| C  | -1.43431600 | 1.16294400  | 2.87330300  |
| C  | 2.34152800  | -2.60989400 | 0.53597700  |
| Yb | 0.00000000  | 0.00000000  | 0.92172800  |

Lu@C<sub>60</sub>\_hexagon

B3LYP/CEP121G Etot = -2563.48484415 Hartree/Minimum\_Frequency\_Value = 31.92 cm<sup>-1</sup>/Spin\_Multiplicity = 2/Point



Group = CS

|   |             |             |             |
|---|-------------|-------------|-------------|
| C | 2.43181900  | 1.44381000  | 2.32325500  |
| C | 2.71005700  | 0.02784100  | 2.33792800  |
| C | 3.25797900  | -0.59759900 | 1.18514200  |
| C | 3.54830200  | 0.20326700  | 0.00000000  |
| C | 3.28136400  | 1.57046900  | 0.00000000  |
| C | 2.71365400  | 2.21033500  | 1.18159700  |
| C | 1.18645100  | 1.67132100  | 3.04870200  |
| C | 0.69339500  | 0.38750400  | 3.50084300  |
| C | 1.63073400  | -0.62088300 | 3.03613600  |
| C | 1.13728800  | -1.86319600 | 2.57900500  |
| C | 2.77621200  | -1.86591900 | 0.73705500  |
| C | 3.25797900  | -0.59759900 | -1.18514200 |
| C | 2.71005700  | 0.02784100  | -2.33792800 |
| C | 2.43181900  | 1.44381000  | -2.32325500 |
| C | 2.71365400  | 2.21033500  | -1.18159700 |
| C | 1.78418000  | 3.21807300  | -0.72807400 |
| C | 1.78418000  | 3.21807300  | 0.72807400  |
| C | 0.58587800  | 3.43833500  | 1.42742500  |
| C | 0.28713700  | 2.64606000  | 2.60289000  |
| C | -0.68603200 | 0.11803000  | 3.49930300  |
| C | -1.62282000 | 1.13695100  | 3.04427300  |
| C | -1.14361800 | 2.36837100  | 2.60057500  |
| C | -1.72010800 | 3.00420800  | 1.42405400  |
| C | -0.65104400 | 3.66158200  | 0.70315800  |
| C | -0.65104400 | 3.66158200  | -0.70315800 |
| C | 0.58587800  | 3.43833500  | -1.42742500 |
| C | 0.28713700  | 2.64606000  | -2.60289000 |
| C | 1.18645100  | 1.67132100  | -3.04870200 |
| C | 2.77621200  | -1.86591900 | -0.73705500 |
| C | -1.18994100 | -1.16009700 | -3.05287000 |
| C | -0.27894300 | -2.15037100 | -2.58898300 |
| C | -0.57400200 | -3.03114400 | -1.45997800 |
| C | -1.80447900 | -2.78344900 | -0.73916900 |
| C | -2.68350800 | -1.72345800 | -1.17708400 |
| C | -2.70215800 | 0.46923900  | -2.32595200 |
| C | -1.62282000 | 1.13695100  | -3.04427300 |
| C | -0.68603200 | 0.11803000  | -3.49930300 |
| C | 0.69339500  | 0.38750400  | -3.50084300 |
| C | 1.63073400  | -0.62088300 | -3.03613600 |
| C | 1.13728800  | -1.86319600 | -2.57900500 |
| C | 0.67927500  | -3.30281100 | -0.74220200 |
| C | 0.67927500  | -3.30281100 | 0.74220200  |
| C | -0.57400200 | -3.03114400 | 1.45997800  |

|    |             |             |             |
|----|-------------|-------------|-------------|
| C  | -1.80447900 | -2.78344900 | 0.73916900  |
| C  | -2.68350800 | -1.72345800 | 1.17708400  |
| C  | -3.24348500 | -1.08369100 | 0.00000000  |
| C  | -3.52970600 | 0.29033400  | 0.00000000  |
| C  | -3.25363800 | 1.08546000  | -1.18227900 |
| C  | -1.14361800 | 2.36837100  | -2.60057500 |
| C  | -1.72010800 | 3.00420800  | -1.42405400 |
| C  | -2.75521600 | 2.36255200  | -0.73097100 |
| C  | -2.75521600 | 2.36255200  | 0.73097100  |
| C  | -3.25363800 | 1.08546000  | 1.18227900  |
| C  | -2.70215800 | 0.46923900  | 2.32595200  |
| C  | -2.42957700 | -0.94261400 | 2.34095900  |
| C  | -1.18994100 | -1.16009700 | 3.05287000  |
| C  | -0.27894300 | -2.15037100 | 2.58898300  |
| C  | 1.71942200  | -2.52915000 | -1.42128800 |
| C  | 1.71942200  | -2.52915000 | 1.42128800  |
| C  | -2.42957700 | -0.94261400 | -2.34095900 |
| Lu | -0.02140300 | -1.21169100 | 0.00000000  |
